# Supplementary material for: S-Heptazine N-ligand based luminescent coordination materials: synthesis, structural and luminescent studies of lanthanide–cyamelurate networks
Source: Royal Society of Chemistry journal article supplement (doi:10.1039/d2dt01924h), 2022-01-01
Supplement: d2dt01924h1.pdf [file d2dt01924h1.pdf]

Electronic Supplementary Information (ESI)

**S-Heptazine N-Ligand Based Luminescent Coordination Materials: Synthesis,  
Structural and Luminescent Studies of Lanthanide-Cyamelurate Networks**

Mohamed Essalhi,<sup>a</sup> Midhun Mohan,<sup>a</sup> Gabriel Marineau-Plante,<sup>b</sup> Adrien Schlacter,<sup>b</sup>  
Thierry Maris,<sup>c</sup> Pierre D. Harvey\*<sup>b</sup> and Adam Duong\*<sup>a</sup>

<sup>a</sup> *Département de Chimie, Biochimie et physique, Institut de Recherche sur l'Hydrogène  
and Laboratory of Functional Materials for Energy and Nanotechnology (DuongLab),  
Université du Québec à Trois-Rivières, Trois-Rivières, Québec, G9A 5H7, Canada*

<sup>b</sup> *Département de chimie, Université de Sherbrooke, Sherbrooke, PQ, J1K 2R1, Canada*

<sup>c</sup> *Département de Chimie, Université de Montréal, Montréal, Québec, H3C 3J7, Canada*

\*To whom correspondence should be addressed. E-mail: [adam.duong@uqtr.ca](mailto:adam.duong@uqtr.ca)

## Contents

**Figure S1.** a) Thermal atomic displacement ellipsoid plot of the asymmetric unit of Dy-Cy from Ln-Cy series 1. The ellipsoids of non-hydrogen atoms are drawn at 50% probability level, and hydrogen atoms are represented by a sphere of arbitrary size. b) Coordination environment for Dy ion center in the crystal structure of Dy-Cy from Ln-Cy series 1..... 5

**Figure S2.** a) Thermal atomic displacement ellipsoid plot of the asymmetric unit of Ho-Cy from Ln-Cy series 2. The ellipsoids of non-hydrogen atoms are drawn at 50% probability level, and hydrogen atoms are represented by a sphere of arbitrary size. b) Coordination environment for Ho ion center in the crystal structure of Ho-Cy from Ln-Cy series 2..... 6

**Figure S3.** a) Thermal atomic displacement ellipsoid plot of the asymmetric unit of Ln-Cy series 3 (Ln = Ce). The ellipsoids of non-hydrogen atoms are drawn at 50% probability level, and hydrogen atoms are represented by a sphere of arbitrary size. b)

|                                                                                                                                                                                                                                                                                                                                                                        |    |
|------------------------------------------------------------------------------------------------------------------------------------------------------------------------------------------------------------------------------------------------------------------------------------------------------------------------------------------------------------------------|----|
| Coordination environment for Ln center in the crystal structure of Ln-Cy series 3 (Ln = Ce).....                                                                                                                                                                                                                                                                       | 7  |
| <b>Figure S4.</b> a) Thermal atomic displacement ellipsoid plot of the asymmetric unit of the Ln-Cy series 4 (Ln = La). The ellipsoids of non-hydrogen atoms are drawn at 50% probability level, and hydrogen atoms are represented by a sphere of arbitrary size. b) Coordination environment for Ln center in the crystal structure of Ln-Cy series 4 (Ln = La)..... | 8  |
| <b>Table S1.</b> Crystal data and structure refinement for Ln-Cy (series 1).....                                                                                                                                                                                                                                                                                       | 9  |
| <b>Table S2.</b> Crystal data and structure refinement for Ln-Cy (series 2).....                                                                                                                                                                                                                                                                                       | 10 |
| <b>Table S3.</b> Crystal data and structure refinement for Ce-Cy (series 3).....                                                                                                                                                                                                                                                                                       | 11 |
| <b>Table S4.</b> Crystal data and structure refinement for La-Cy (series 4).....                                                                                                                                                                                                                                                                                       | 12 |
| <b>Table S5.</b> Effective ionic radii (Å) of Ln <sup>3+</sup> ions with corresponding coordination number (Shannon-Prewitt data).....                                                                                                                                                                                                                                 | 12 |
| <b>Figure S5.</b> Effective ionic radius (Å) vs Ln <sup>3+</sup> ions (cn = coordination number).....                                                                                                                                                                                                                                                                  | 13 |
| <b>Figure S6.</b> Two-dimensional fingerprint plots of the Ln-Cy series 1.....                                                                                                                                                                                                                                                                                         | 14 |
| <b>Figure S7.</b> Two-dimensional fingerprint plots of Ln-Cy series 2.....                                                                                                                                                                                                                                                                                             | 14 |
| <b>Figure S8.</b> Two-dimensional fingerprint plots of Ln-Cy series 3.....                                                                                                                                                                                                                                                                                             | 15 |
| <b>Figure S9.</b> Two-dimensional fingerprint plots of Ln-Cy series 4.....                                                                                                                                                                                                                                                                                             | 15 |
| <b>Figure S10.</b> FTIR spectra of Ln-Cy series 1 in comparison with potassium cyamelurate.....                                                                                                                                                                                                                                                                        | 16 |
| <b>Figure S11.</b> FTIR spectra of Ln-Cy series 2 in comparison with potassium cyamelurate.....                                                                                                                                                                                                                                                                        | 16 |
| <b>Figure S12.</b> FTIR spectra of Ln-Cy series 3 in comparison with potassium cyamelurate.....                                                                                                                                                                                                                                                                        | 17 |
| <b>Figure S13.</b> FTIR spectra of Ln-Cy series 4 in comparison with potassium cyamelurate.....                                                                                                                                                                                                                                                                        | 17 |
| <b>Figure S14.</b> Experimental and simulated PXRD patterns for La-Cy compound.....                                                                                                                                                                                                                                                                                    | 18 |

|                                                                                                                                                                                                                                                                                                                                                                                                                                                                                     |    |
|-------------------------------------------------------------------------------------------------------------------------------------------------------------------------------------------------------------------------------------------------------------------------------------------------------------------------------------------------------------------------------------------------------------------------------------------------------------------------------------|----|
| <b>Figure S15.</b> Experimental and simulated PXRD patterns for Ce-Cy compound.....                                                                                                                                                                                                                                                                                                                                                                                                 | 18 |
| <b>Figure S16.</b> Experimental and simulated PXRD patterns for Ln-Cy series 1. ....                                                                                                                                                                                                                                                                                                                                                                                                | 19 |
| <b>Figure S17.</b> Experimental and simulated PXRD patterns for Ln-Cy series 2. ....                                                                                                                                                                                                                                                                                                                                                                                                | 19 |
| <b>Figure S18.</b> Thermogravimetric analysis curves for Ln-Cy series 1. ....                                                                                                                                                                                                                                                                                                                                                                                                       | 20 |
| <b>Figure S19.</b> Thermogravimetric analysis curves for Ln-Cy series 2. ....                                                                                                                                                                                                                                                                                                                                                                                                       | 20 |
| <b>Figure S20.</b> Thermogravimetric analysis curve for Ln-Cy series 3.....                                                                                                                                                                                                                                                                                                                                                                                                         | 21 |
| <b>Figure S21.</b> Thermogravimetric analysis curve for Ln-Cy series 4.....                                                                                                                                                                                                                                                                                                                                                                                                         | 21 |
| <b>Figure S22.</b> Absorption (black), emission (red) and excitation (blue) spectra for K <sub>3</sub> Cy in solution in water at 298 K ( $\lambda_{\text{ex}} = 270$ nm, $\lambda_{\text{em}} = 364$ nm). The weak signal at ~305 nm is suspected to be fluorescence, and the large and intense one centered at 364 nm is assigned to a triplet emission. Unfortunately, the ligand decomposes upon laser exposure at 266 nm, so the fluorescence lifetime is not accessible. .... | 22 |
| <b>Figure S23.</b> Side and front view of geometry optimization for Cy <sup>3-</sup> anion in the gas phase. ....                                                                                                                                                                                                                                                                                                                                                                   | 22 |
| <b>Table S6.</b> Cartesian coordinates (Å) of the geometry optimized Cy <sup>3-</sup> in the gas phase. ..                                                                                                                                                                                                                                                                                                                                                                          | 23 |
| <b>Table S7.</b> Calculated position, oscillator strength (f) and major contributions (%) of the first 100 singlet-singlet electronic transitions for Cy <sup>3-</sup> in the gas phase. ....                                                                                                                                                                                                                                                                                       | 23 |
| <b>Figure S24.</b> Simulated absorption spectrum for Cy <sup>3-</sup> in the gas phase by TDDFT computations. Bar graph reporting the calculated oscillator strength and the calculated position of the 100th electronic transitions calculated by TDDFT for Cy <sup>3-</sup> in the gas phase (bar graph; f = computed oscillator strength). ....                                                                                                                                  | 27 |
| <b>Figure S25.</b> Solid-state absorption (black), emission (red) and excitation (blue) spectra for La-Cy at 298 K ( $\lambda_{\text{ex}} = 270$ nm, $\lambda_{\text{em}} = 335$ nm) and 77K ( $\lambda_{\text{ex}} = 270$ nm, $\lambda_{\text{em}} = 355$ nm). ....                                                                                                                                                                                                                | 28 |
| <b>Figure S26.</b> Decay of emission intensity, fit, IRF and residual of Gd-Cy at 298 K. $\lambda = 339$ nm ( $\lambda_{\text{ex}} = 277$ nm), $\tau_e$ {f%} = 15 $\mu$ s {100}, $\chi^2 = 1.070$ .....                                                                                                                                                                                                                                                                             | 28 |
| <b>Figure S27.</b> Solid-state absorption (black), emission (red) and excitation (blue) spectra for Sm-Cy at 77K ( $\lambda_{\text{ex}} = 290$ nm, $\lambda_{\text{em}} = 643$ nm).....                                                                                                                                                                                                                                                                                             | 29 |

|                                                                                                                                                                                                                                                                       |    |
|-----------------------------------------------------------------------------------------------------------------------------------------------------------------------------------------------------------------------------------------------------------------------|----|
| <b>Figure S28.</b> Solid-state absorption (black), emission (red) and excitation (blue) spectra for Eu-Cy at 77K ( $\lambda_{\text{ex}} = 300$ nm, $\lambda_{\text{em}} = 615$ nm). .....                                                                             | 29 |
| <b>Figure S29.</b> Decay of emission intensity, fit, IRF and residual of Eu-Cy. Left at 77 K $\lambda = 615$ nm ( $\lambda_{\text{ex}} = 300$ nm), $\tau_e$ {f%} = 16 $\mu\text{s}$ {100}, $\chi^2 = 1.001$ .....                                                     | 30 |
| <b>Figure S31.</b> Decay of emission intensity, fit, IRF and residual of Tb-Cy. Left, at 77 K $\lambda = 620$ nm ( $\lambda_{\text{ex}} = 270$ nm), $\tau_e$ {f%} = 50 $\mu\text{s}$ {100}, $\chi^2 = 1.031$ .....                                                    | 31 |
| <b>Figure S32.</b> Solid-state absorption (black), emission (red) and excitation (blue) spectra for Dy-Cy at 298 K ( $\lambda_{\text{ex}} = 270$ nm, $\lambda_{\text{em}} = 571$ nm) and 77K ( $\lambda_{\text{ex}} = 270$ nm, $\lambda_{\text{em}} = 575$ nm). ..... | 31 |
| <b>Figure S33.</b> Decay of emission intensity, fit, IRF and residual of Dy-Cy at 298 K. $\lambda = 570$ nm ( $\lambda_{\text{ex}} = 270$ nm), $\tau_e$ {f%} = 3.48 $\mu\text{s}$ {100}, $\chi^2 = 1.034$ .....                                                       | 32 |
| <b>Figure S34.</b> Solid-state absorption (black), emission (red) and excitation (blue) spectra for Er-Cy at 298 K ( $\lambda_{\text{ex}} = 300$ nm, $\lambda_{\text{em}} = 336$ nm). .....                                                                           | 32 |
| <b>Figure S35.</b> Solid-state absorption (black) spectra for Ce-Cy at 298 K. ....                                                                                                                                                                                    | 33 |
| <b>Figure S36.</b> Solid-state absorption (black) spectra for Pr-Cy- at 298 K.....                                                                                                                                                                                    | 33 |
| <b>Figure S37.</b> Solid-state absorption (black) for Ho-Cy at 298 K. ....                                                                                                                                                                                            | 34 |
| <b>Table S8.</b> Photophysical properties of all emissive Ln-Cy.....                                                                                                                                                                                                  | 34 |

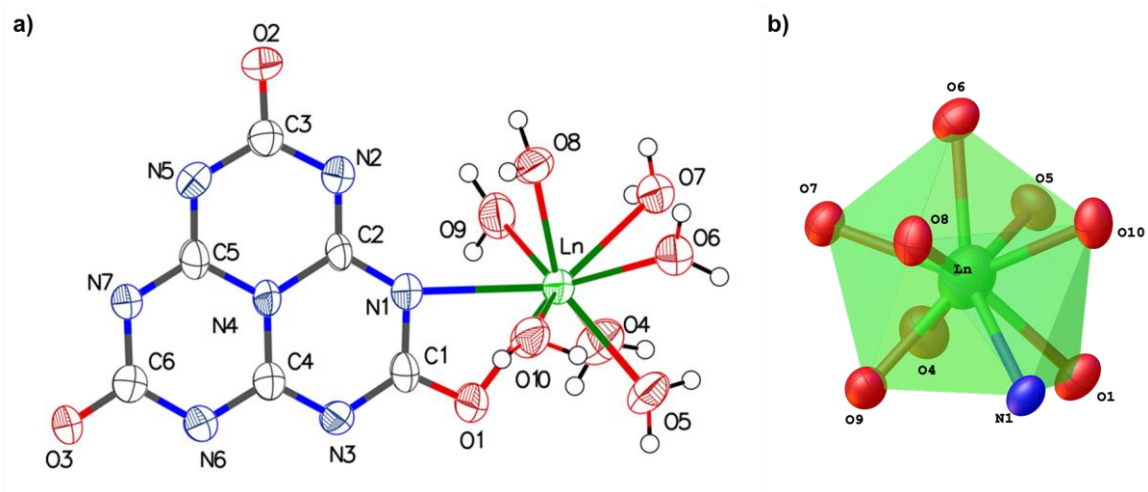

**Figure S1.** a) Thermal atomic displacement ellipsoid plot of the asymmetric unit of Dy-Cy from Ln-Cy series 1. The ellipsoids of non-hydrogen atoms are drawn at 50% probability level, and hydrogen atoms are represented by a sphere of arbitrary size. b) Coordination environment for Dy ion center in the crystal structure of Dy-Cy from Ln-Cy series 1.

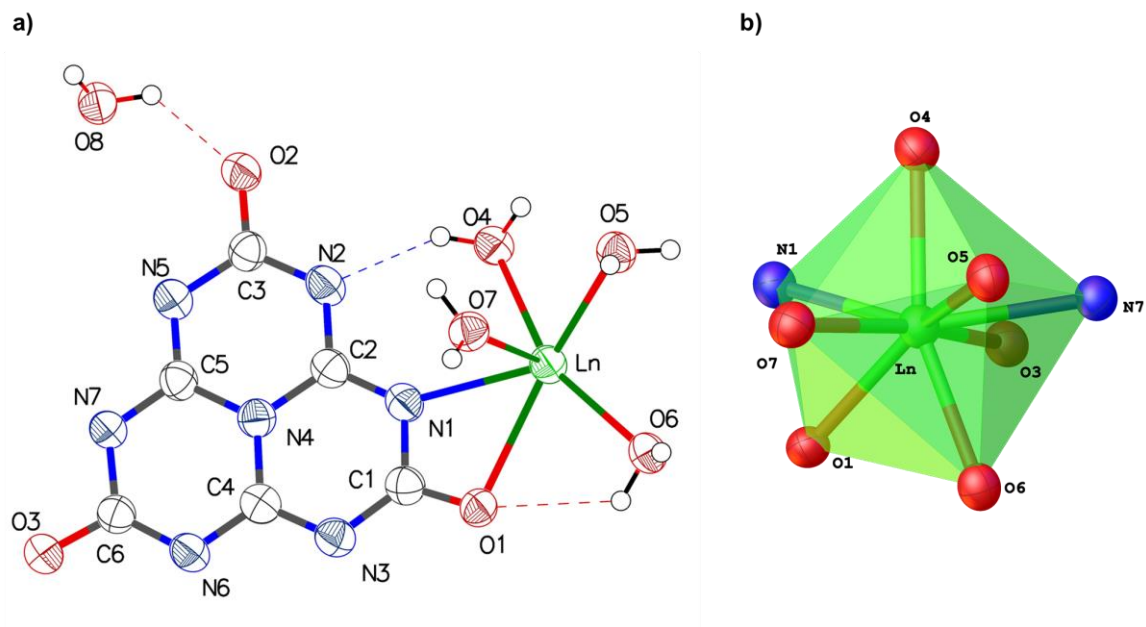

**Figure S2.** a) Thermal atomic displacement ellipsoid plot of the asymmetric unit of Ho-Cy from Ln-Cy series 2. The ellipsoids of non-hydrogen atoms are drawn at 50% probability level, and hydrogen atoms are represented by a sphere of arbitrary size. b) Coordination environment for Ho ion center in the crystal structure of Ho-Cy from Ln-Cy series 2.

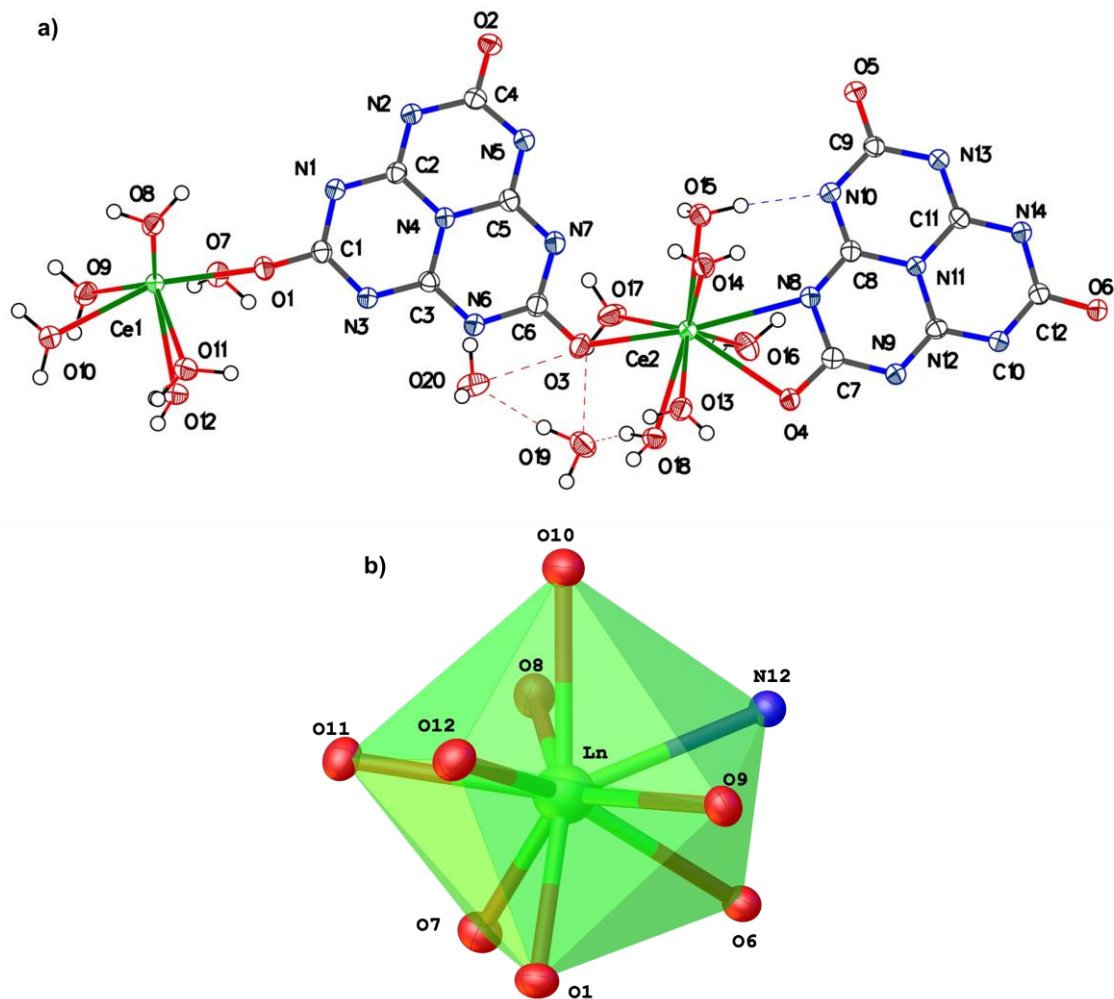

**Figure S3.** a) Thermal atomic displacement ellipsoid plot of the asymmetric unit of Ln-Cy series 3 (Ln = Ce). The ellipsoids of non-hydrogen atoms are drawn at 50% probability level, and hydrogen atoms are represented by a sphere of arbitrary size. b) Coordination environment for Ln center in the crystal structure of Ln-Cy series 3 (Ln = Ce).

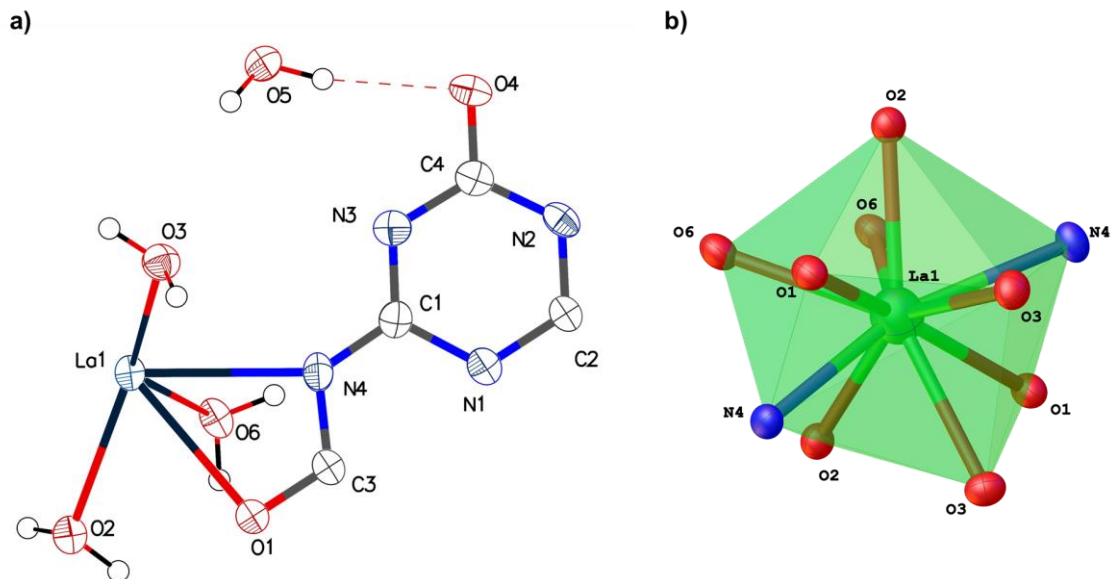

**Figure S4.** a) Thermal atomic displacement ellipsoid plot of the asymmetric unit of the Ln-Cy series 4 (Ln = La). The ellipsoids of non-hydrogen atoms are drawn at 50% probability level, and hydrogen atoms are represented by a sphere of arbitrary size. b) Coordination environment for Ln center in the crystal structure of Ln-Cy series 4 (Ln = La).



**Table S1.** Crystal data and structure refinement for Ln-Cy (series 1).

| Identification code                     | Sm-Cy                                                               | Eu-Cy                                                               | Tb-Cy                                                               | Dy-Cy                                                               |
|-----------------------------------------|---------------------------------------------------------------------|---------------------------------------------------------------------|---------------------------------------------------------------------|---------------------------------------------------------------------|
| <b>Empirical formula</b>                | C <sub>6</sub> H <sub>14</sub> N <sub>7</sub> O <sub>10</sub> Sm    | C <sub>6</sub> H <sub>14</sub> N <sub>7</sub> O <sub>10</sub> Eu    | C <sub>6</sub> H <sub>14</sub> N <sub>7</sub> O <sub>10</sub> Tb    | C <sub>6</sub> H <sub>14</sub> N <sub>7</sub> O <sub>10</sub> Dy    |
| <b>CCDC number</b>                      | 2178361                                                             | 2178362                                                             | 2178359                                                             | 2178360                                                             |
| <b>Formula weight</b>                   | 494.59                                                              | 496.20                                                              | 503.16                                                              | 506.74                                                              |
| <b>Temperature/K</b>                    | 298                                                                 | 295                                                                 | 298                                                                 | 295                                                                 |
| <b>Crystal system</b>                   | monoclinic                                                          | monoclinic                                                          | monoclinic                                                          | monoclinic                                                          |
| <b>Space group</b>                      | <i>P</i> 2 <sub>1</sub> / <i>n</i>                                  |
| <b>a/Å</b>                              | 11.9028(6)                                                          | 11.8872(6)                                                          | 11.8582(4)                                                          | 11.8401(11)                                                         |
| <b>b/Å</b>                              | 6.8680(3)                                                           | 6.8605(3)                                                           | 6.8416(2)                                                           | 6.8183(7)                                                           |
| <b>c/Å</b>                              | 16.7913(8)                                                          | 16.7718(8)                                                          | 16.6967(5)                                                          | 16.6650(16)                                                         |
| <b>α/°</b>                              | 90                                                                  | 90                                                                  | 90                                                                  | 90                                                                  |
| <b>β/°</b>                              | 93.617(2)                                                           | 93.608(2)                                                           | 93.700(1)                                                           | 93.753(4)                                                           |
| <b>γ/°</b>                              | 90                                                                  | 90                                                                  | 90                                                                  | 90                                                                  |
| <b>Volume/Å<sup>3</sup></b>             | 1369.93(11)                                                         | 1365.07(11)                                                         | 1351.76(7)                                                          | 1342.5(2)                                                           |
| <b>Z</b>                                | 4                                                                   | 4                                                                   | 4                                                                   | <b>2 4</b>                                                          |
| <b>ρ<sub>calc</sub>/cm<sup>3</sup></b>  | 2.398                                                               | 2.414                                                               | 2.472                                                               | 2.507                                                               |
| <b>μ/mm<sup>-1</sup></b>                | 32.936                                                              | 33.639                                                              | 26.484                                                              | 30.541                                                              |
| <b>F(000)</b>                           | 964.0                                                               | 968.0                                                               | 976.0                                                               | 980.0                                                               |
| <b>Radiation</b>                        | CuKα (λ = 1.54178)                                                  |
| <b>2θ range for data collection/°</b>   | 8.848 to 140.184                                                    | 8.86 to 141.39                                                      | 8.882 to 140.274                                                    | 8.892 to 140.642                                                    |
| <b>Reflections collected</b>            | 35375                                                               | 23809                                                               | 24483                                                               | 18994                                                               |
| <b>Independent reflections</b>          | 2614<br>[R <sub>int</sub> = 0.0372,<br>R <sub>sigma</sub> = 0.0135] | 2598<br>[R <sub>int</sub> = 0.0440,<br>R <sub>sigma</sub> = 0.0222] | 2561<br>[R <sub>int</sub> = 0.0402,<br>R <sub>sigma</sub> = 0.0213] | 2503<br>[R <sub>int</sub> = 0.0752,<br>R <sub>sigma</sub> = 0.0442] |
| <b>Goodness-of-fit on F<sup>2</sup></b> | 1.036                                                               | 1.043                                                               | 1.053                                                               | 1.108                                                               |
| <b>Final R indexes [I ≥ 2σ(I)]</b>      | R <sub>1</sub> = 0.0206,<br>wR <sub>2</sub> = 0.0571                | R <sub>1</sub> = 0.0331,<br>wR <sub>2</sub> = 0.0769                | R <sub>1</sub> = 0.0248,<br>wR <sub>2</sub> = 0.0616                | R <sub>1</sub> = 0.0714,<br>wR <sub>2</sub> = 0.1944                |
| <b>Final R indexes [all data]</b>       | R <sub>1</sub> = 0.0207,<br>wR <sub>2</sub> = 0.0571                | R <sub>1</sub> = 0.0339,<br>wR <sub>2</sub> = 0.0774                | R <sub>1</sub> = 0.0265,<br>wR <sub>2</sub> = 0.0626                | R <sub>1</sub> = 0.0787,<br>wR <sub>2</sub> = 0.2056                |

**Table S2.** Crystal data and structure refinement for Ln-Cy (series 2).

| Identification code                     | Ho-Cy                                                           | Er-Cy                                                           | Yb-Cy                                                           |
|-----------------------------------------|-----------------------------------------------------------------|-----------------------------------------------------------------|-----------------------------------------------------------------|
| <b>Empirical formula</b>                | C <sub>6</sub> H <sub>10</sub> N <sub>7</sub> O <sub>8</sub> Ho | C <sub>6</sub> H <sub>10</sub> N <sub>7</sub> O <sub>8</sub> Er | C <sub>6</sub> H <sub>10</sub> N <sub>7</sub> O <sub>8</sub> Yb |
| <b>CCDC number</b>                      | 2178364                                                         | 2178356                                                         | 2178363                                                         |
| <b>Formula weight</b>                   | 946.28                                                          | 475.47                                                          | 481.25                                                          |
| <b>Temperature/K</b>                    | 298                                                             | 100                                                             | 100                                                             |
| <b>Crystal system</b>                   | monoclinic                                                      | monoclinic                                                      | monoclinic                                                      |
| <b>Space group</b>                      | Cc                                                              | Cc                                                              | Cc                                                              |
| <b>a/Å</b>                              | 5.7138(3)                                                       | 5.69360(10)                                                     | 5.6782(2)                                                       |
| <b>b/Å</b>                              | 12.1155(7)                                                      | 12.0266(3)                                                      | 12.0332(4)                                                      |
| <b>c/Å</b>                              | 17.6748(10)                                                     | 17.6197(4)                                                      | 17.5540(6)                                                      |
| <b>α/°</b>                              | 90                                                              | 90                                                              | 90                                                              |
| <b>β/°</b>                              | 91.136(2)                                                       | 90.8670(10)                                                     | 90.652(2)                                                       |
| <b>γ/°</b>                              | 90                                                              | 90                                                              | 90                                                              |
| <b>Volume/Å<sup>3</sup></b>             | 1223.31(12)                                                     | 1206.36(5)                                                      | 1199.33(7)                                                      |
| <b>Z</b>                                | 4                                                               | 4                                                               | 4                                                               |
| <b>ρ<sub>calc</sub>/cm<sup>3</sup></b>  | 2.569                                                           | 2.618                                                           | 2.665                                                           |
| <b>μ/mm<sup>-1</sup></b>                | 12.716                                                          | 13.558                                                          | 15.071                                                          |
| <b>F(000)</b>                           | 904.0                                                           | 908.0                                                           | 916.0                                                           |
| <b>Radiation</b>                        | CuKα (λ = 1.54178)                                              | CuKα (λ = 1.54178)                                              | CuKα (λ = 1.54178)                                              |
| <b>2θ range for data collection/°</b>   | 10.01 to 140.308                                                | 10.042 to 143.402                                               | 10.078 to 143.992                                               |
| <b>Reflections collected</b>            | 11086                                                           | 14549                                                           | 20269                                                           |
| <b>Independent reflections</b>          | 2228                                                            | 2115                                                            | 2318                                                            |
|                                         | [R <sub>int</sub> = 0.0486,<br>R <sub>sigma</sub> = 0.0272]     | [R <sub>int</sub> = 0.0186,<br>R <sub>sigma</sub> = 0.0116]     | [R <sub>int</sub> = 0.0274,<br>R <sub>sigma</sub> = 0.0145]     |
| <b>Goodness-of-fit on F<sup>2</sup></b> | 1.078                                                           | 1.106                                                           | 1.079                                                           |
| <b>Final R indexes [I&gt;2σ (I)]</b>    | R <sub>1</sub> = 0.0411,<br>wR <sub>2</sub> = 0.0984            | R <sub>1</sub> = 0.0246,<br>wR <sub>2</sub> = 0.0635            | R <sub>1</sub> = 0.0207,<br>wR <sub>2</sub> = 0.0518            |
| <b>Final R indexes [all data]</b>       | R <sub>1</sub> = 0.0415,<br>wR <sub>2</sub> = 0.0990            | R <sub>1</sub> = 0.0246,<br>wR <sub>2</sub> = 0.0635            | R <sub>1</sub> = 0.0209,<br>wR <sub>2</sub> = 0.0519            |

**Table S3.** Crystal data and structure refinement for Ce-Cy (series 3).

|                                         |                                                                 |
|-----------------------------------------|-----------------------------------------------------------------|
| <b>Identification code</b>              | <b>Ce-Cy</b>                                                    |
| <b>Empirical formula</b>                | C <sub>6</sub> H <sub>14</sub> CeN <sub>7</sub> O <sub>10</sub> |
| <b>CCDC number</b>                      | 2178358                                                         |
| <b>Formula weight</b>                   | 484.36                                                          |
| <b>Temperature/K</b>                    | 150                                                             |
| <b>Crystal system</b>                   | monoclinic                                                      |
| <b>Space group</b>                      | P2 <sub>1</sub> /c                                              |
| <b>a/Å</b>                              | 6.6711(4)                                                       |
| <b>b/Å</b>                              | 19.7592(12)                                                     |
| <b>c/Å</b>                              | 21.1063(13)                                                     |
| <b>α/°</b>                              | 90                                                              |
| <b>β/°</b>                              | 98.303(2)                                                       |
| <b>γ/°</b>                              | 90                                                              |
| <b>Volume/Å<sup>3</sup></b>             | 2753.0(3)                                                       |
| <b>Z</b>                                | 8                                                               |
| <b>ρ<sub>calc</sub>/cm<sup>3</sup></b>  | 2.337                                                           |
| <b>μ/mm<sup>-1</sup></b>                | 18.091                                                          |
| <b>F(000)</b>                           | 1896.0                                                          |
| <b>Radiation</b>                        | GaKα (λ = 1.34139)                                              |
| <b>2θ range for data collection/°</b>   | 5.356 to 121.44                                                 |
| <b>Index ranges</b>                     | -8 ≤ h ≤ 8, -25 ≤ k ≤ 25, -27 ≤ l ≤ 27                          |
| <b>Reflections collected</b>            | 79204                                                           |
| <b>Independent reflections</b>          | 6336 [R <sub>int</sub> = 0.0309, R <sub>sigma</sub> = 0.0125]   |
| <b>Data/restraints/parameters</b>       | 6336/0/448                                                      |
| <b>Goodness-of-fit on F<sup>2</sup></b> | 1.081                                                           |
| <b>Final R indexes [I ≥ 2σ (I)]</b>     | R <sub>1</sub> = 0.0188, wR <sub>2</sub> = 0.0502               |
| <b>Final R indexes [all data]</b>       | R <sub>1</sub> = 0.0195, wR <sub>2</sub> = 0.0506               |

**Table S4.** Crystal data and structure refinement for La-Cy (series 4).

|                                         |                                                                 |
|-----------------------------------------|-----------------------------------------------------------------|
| <b>Identification code</b>              | <b>La-Cy</b>                                                    |
| <b>Empirical formula</b>                | C <sub>6</sub> H <sub>14</sub> LaN <sub>7</sub> O <sub>10</sub> |
| <b>CCDC number</b>                      | 2178357                                                         |
| <b>Formula weight</b>                   | 483.15                                                          |
| <b>Temperature/K</b>                    | 100                                                             |
| <b>Crystal system</b>                   | orthorhombic                                                    |
| <b>Space group</b>                      | I2 <sub>1</sub> 2 <sub>1</sub> 2 <sub>1</sub>                   |
| <b>a/Å</b>                              | 6.5379(2)                                                       |
| <b>b/Å</b>                              | 10.6082(3)                                                      |
| <b>c/Å</b>                              | 19.3914(6)                                                      |
| <b>α/°</b>                              | 90                                                              |
| <b>β/°</b>                              | 90                                                              |
| <b>γ/°</b>                              | 90                                                              |
| <b>Volume/Å<sup>3</sup></b>             | 1344.90(7)                                                      |
| <b>Z</b>                                | 4                                                               |
| <b>ρ<sub>calc</sub>/cm<sup>3</sup></b>  | 2.386                                                           |
| <b>μ/mm<sup>-1</sup></b>                | 17.378                                                          |
| <b>F(000)</b>                           | 944.0                                                           |
| <b>Radiation</b>                        | GaKα (λ = 1.34139)                                              |
| <b>2θ range for data collection/°</b>   | 7.934 to 109.854                                                |
| <b>Reflections collected</b>            | 11301                                                           |
| <b>Independent reflections</b>          | 1269 [R <sub>int</sub> = 0.0309, R <sub>sigma</sub> = 0.0157]   |
| <b>Goodness-of-fit on F<sup>2</sup></b> | 1.095                                                           |
| <b>Final R indexes [I ≥ 2σ (I)]</b>     | R <sub>1</sub> = 0.0403, wR <sub>2</sub> = 0.0992               |
| <b>Final R indexes [all data]</b>       | R <sub>1</sub> = 0.0403, wR <sub>2</sub> = 0.0993               |

**Table S5.** Effective ionic radii (Å) of Ln<sup>3+</sup> ions with corresponding coordination number (Shannon-Prewitt data).

| Ln-Cy series | Ln ion           | Effective ionic radii (Å) | Charge density (C.mm <sup>-3</sup> ) | Coordination number (CN) |
|--------------|------------------|---------------------------|--------------------------------------|--------------------------|
| 3            | La <sup>3+</sup> | 1.270                     | 72                                   | 10                       |
| 4            | Ce <sup>3+</sup> | 1.196                     | 75                                   | 9                        |
| 1            | Pr <sup>3+</sup> | 1.179                     | 79                                   | 9                        |
|              | Sm <sup>3+</sup> | 1.132                     | 86                                   |                          |
|              | Eu <sup>3+</sup> | 1.120                     | 88                                   |                          |
|              | Gd <sup>3+</sup> | 1.107                     | 91                                   |                          |
|              | Tb <sup>3+</sup> | 1.095                     | 96                                   |                          |
|              | Dy <sup>3+</sup> | 1.083                     | 99                                   |                          |
| 2            | Ho <sup>3+</sup> | 1.015                     | 102                                  | 8                        |
|              | Er <sup>3+</sup> | 1.004                     | 105                                  |                          |
|              | Tm <sup>3+</sup> | 0.994                     | 108                                  |                          |
|              | Yb <sup>3+</sup> | 0.985                     | 111                                  |                          |

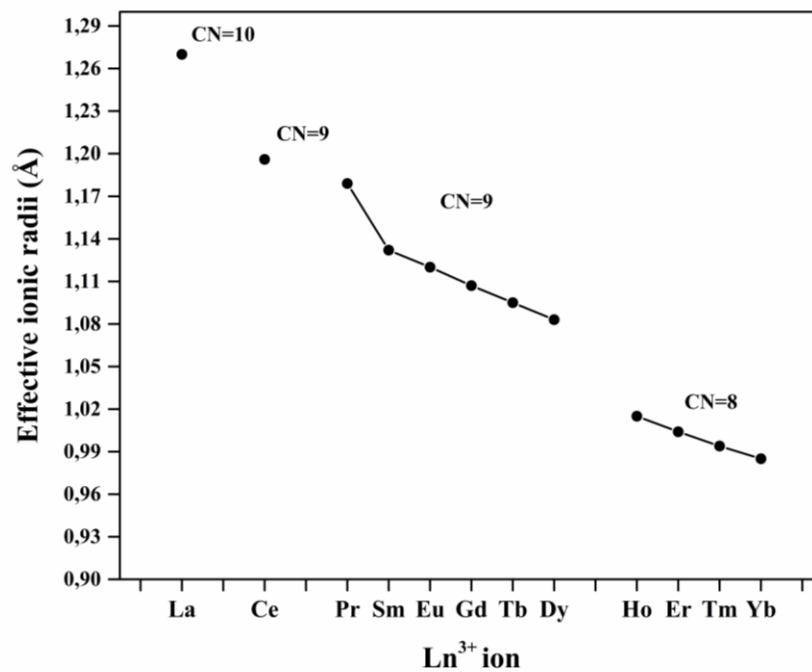

**Figure S5.** Effective ionic radius (Å) vs Ln<sup>3+</sup> ions (cn = coordination number).

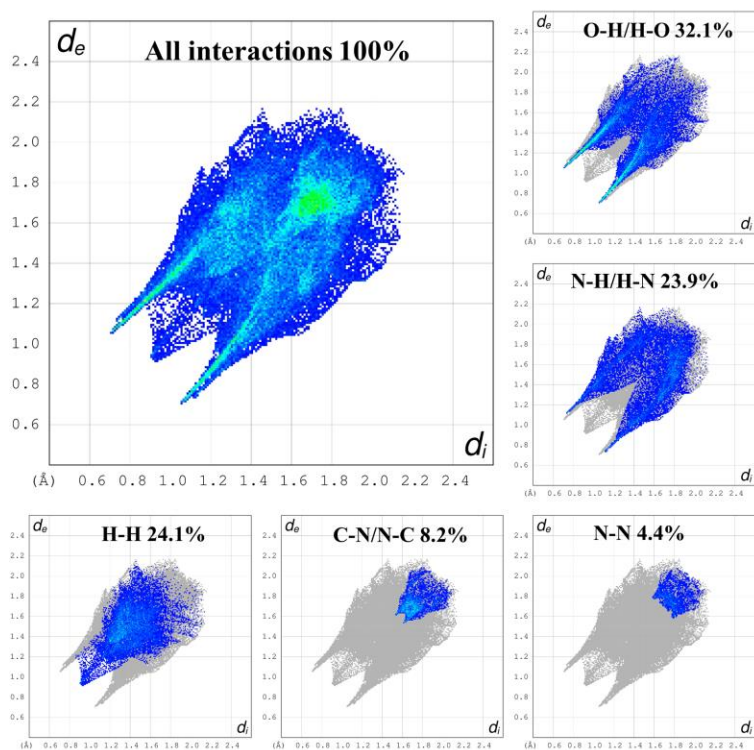

**Figure S6.** Two-dimensional fingerprint plots of the Ln-Cy series 1.

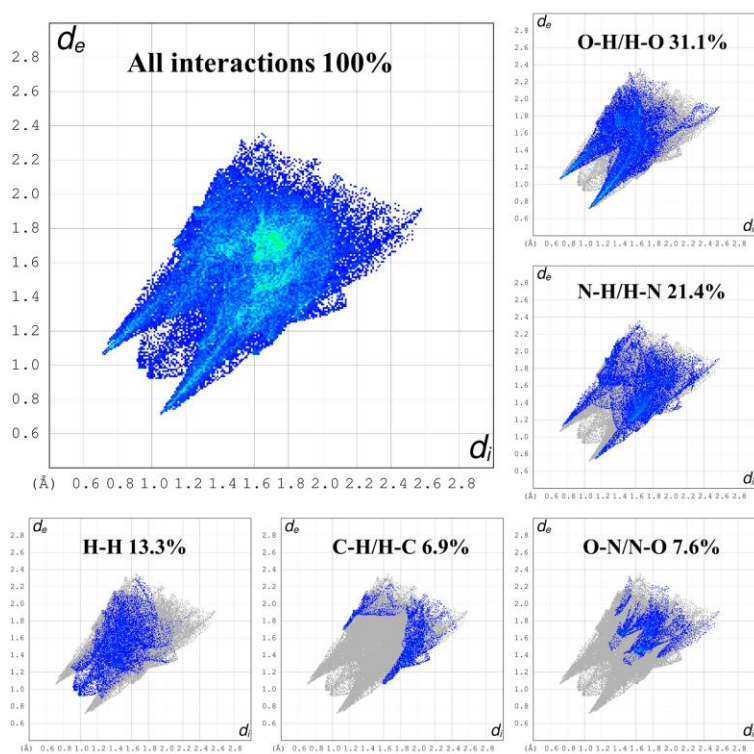

**Figure S7.** Two-dimensional fingerprint plots of Ln-Cy series 2.

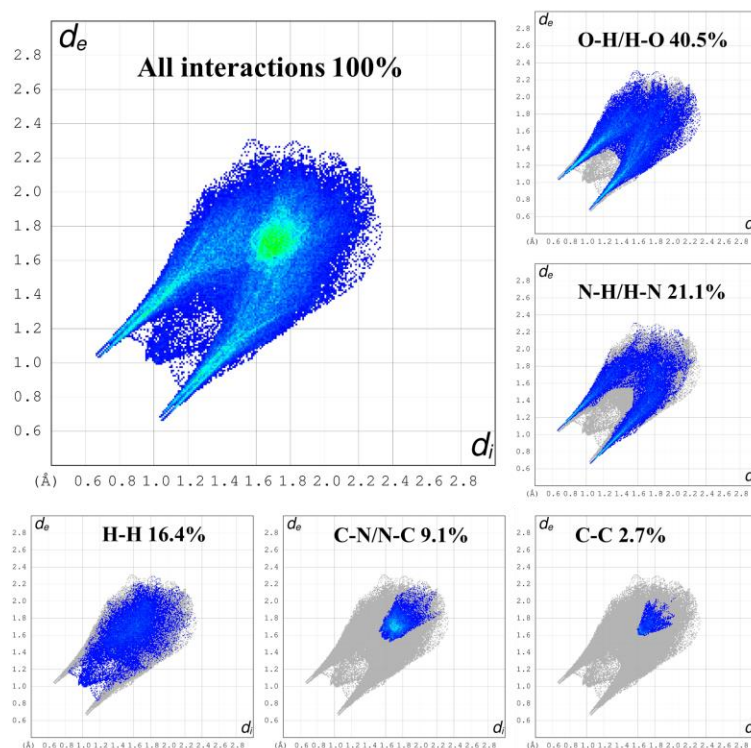

**Figure S8.** Two-dimensional fingerprint plots of Ln-Cy series 3.

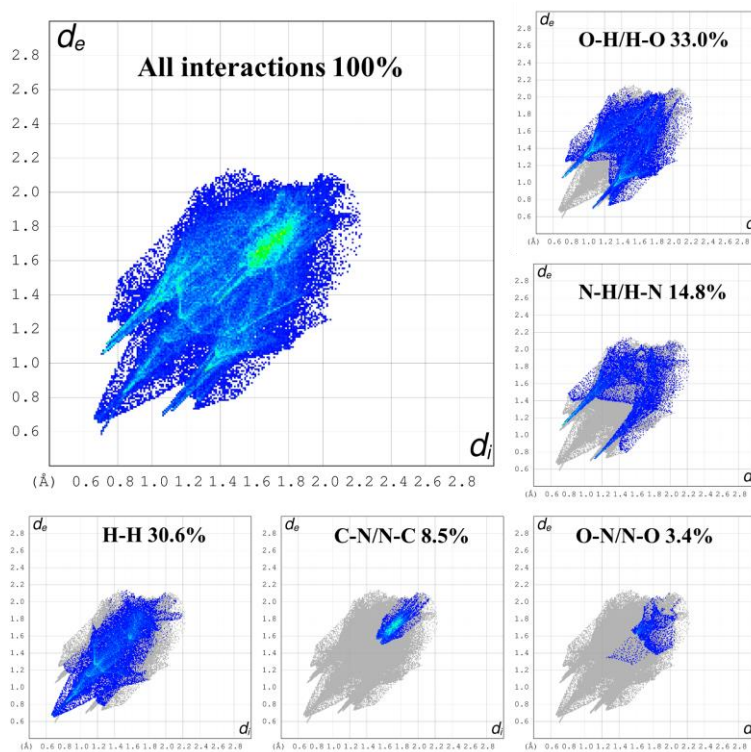

**Figure S9.** Two-dimensional fingerprint plots of Ln-Cy series 4.

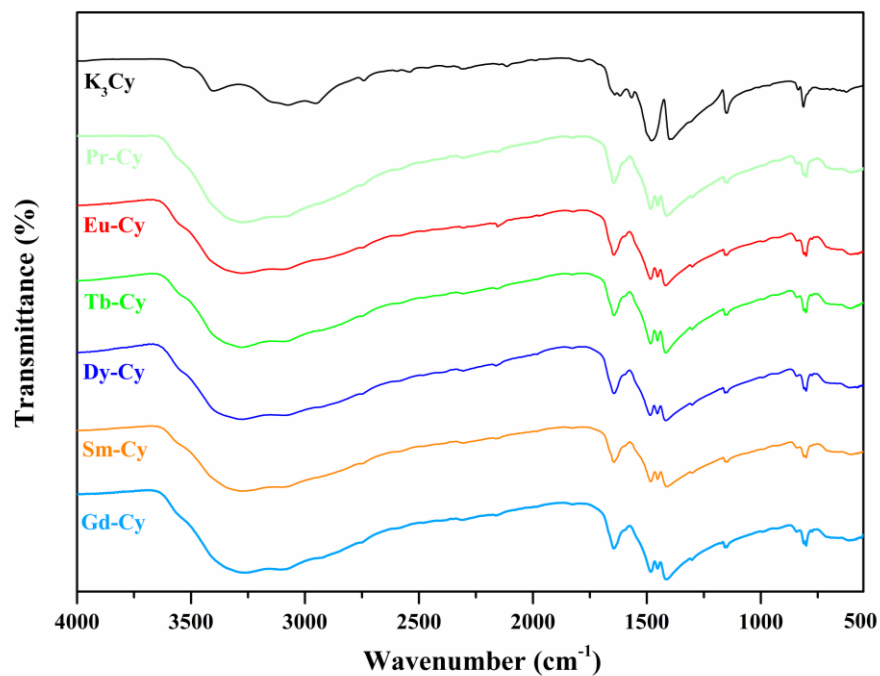

**Figure S10.** FTIR spectra of Ln-Cy series 1 in comparison with potassium cyamelurate.

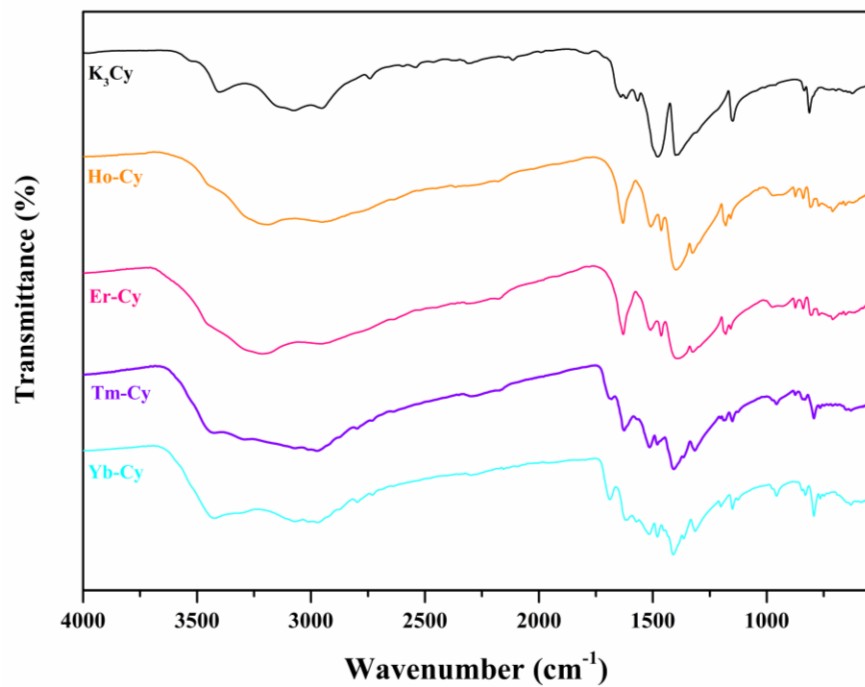

**Figure S11.** FTIR spectra of Ln-Cy series 2 in comparison with potassium cyamelurate.



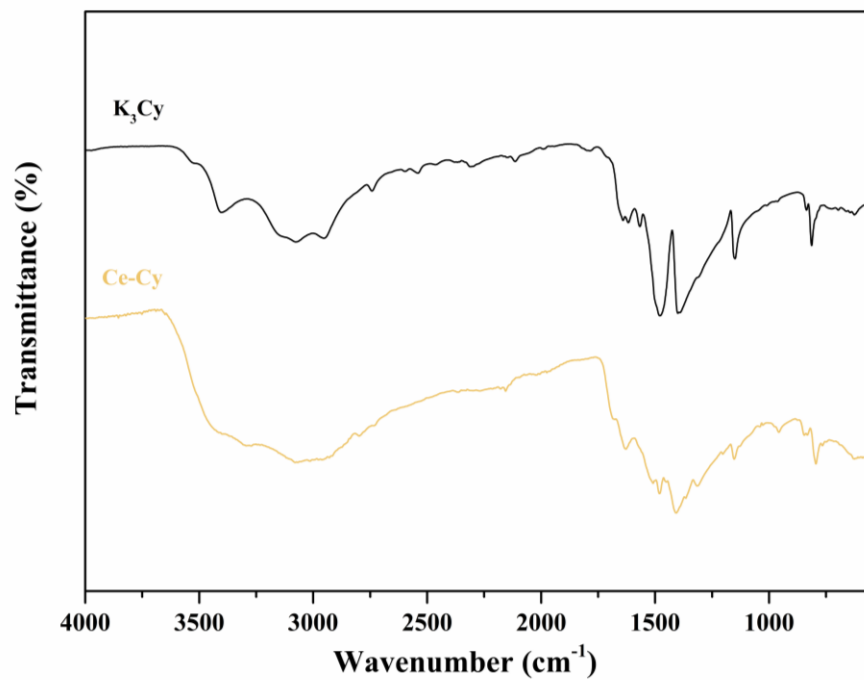

**Figure S12.** FTIR spectra of Ln-Cy series 3 in comparison with potassium cyamelurate.

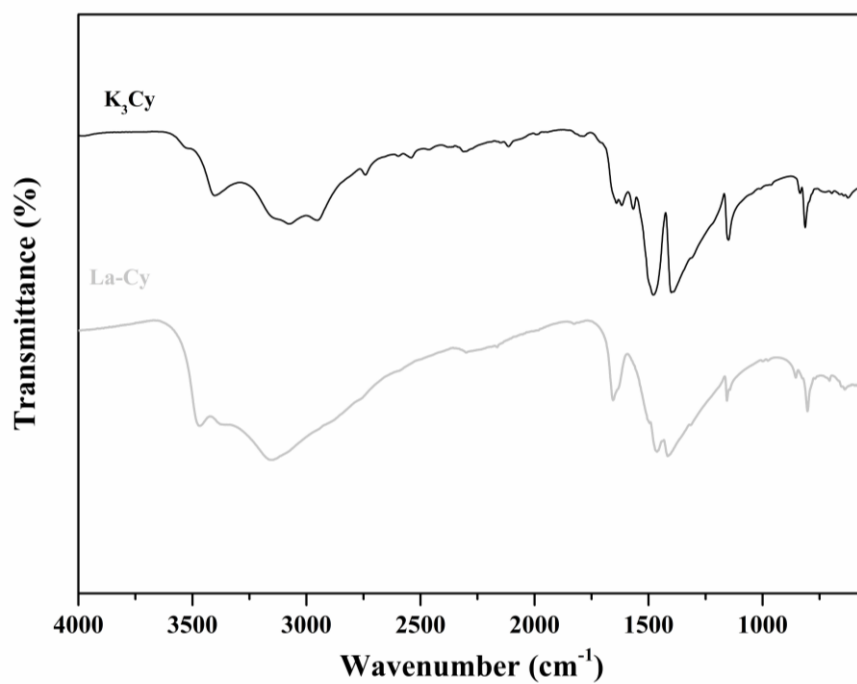

**Figure S13.** FTIR spectra of Ln-Cy series 4 in comparison with potassium cyamelurate.

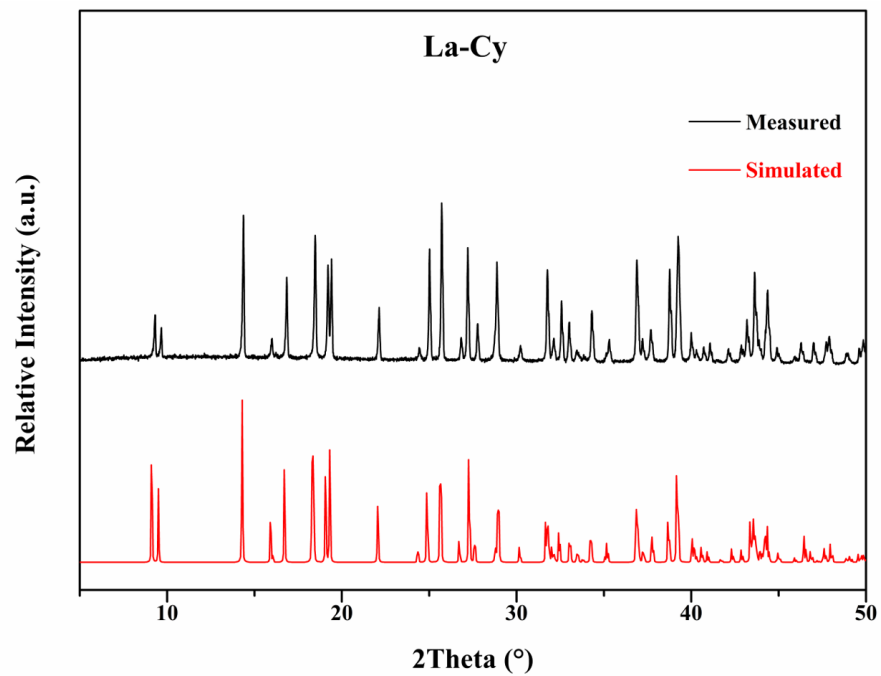

**Figure S14.** Experimental and simulated PXRD patterns for La-Cy compound.

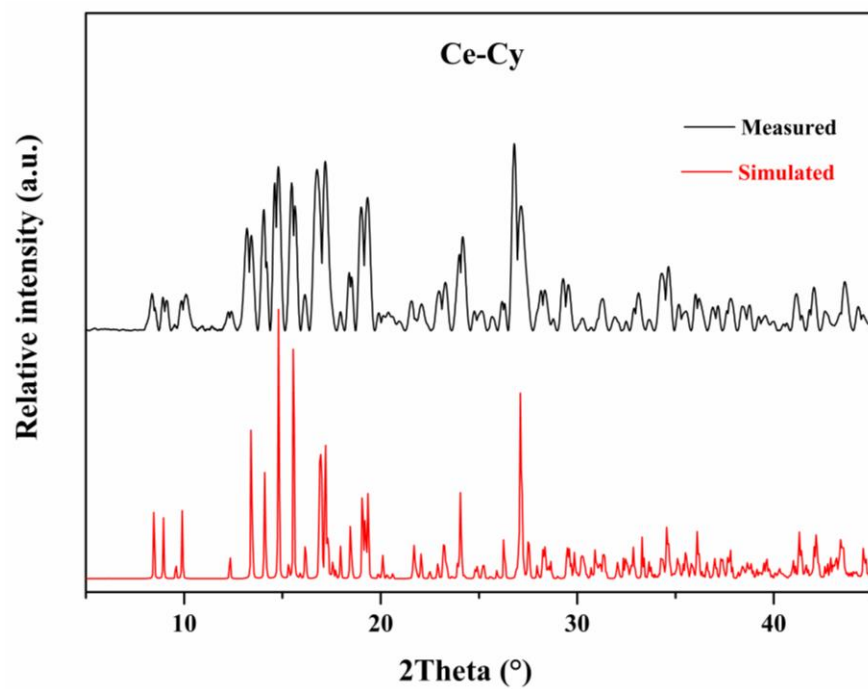

**Figure S15.** Experimental and simulated PXRD patterns for Ce-Cy compound.

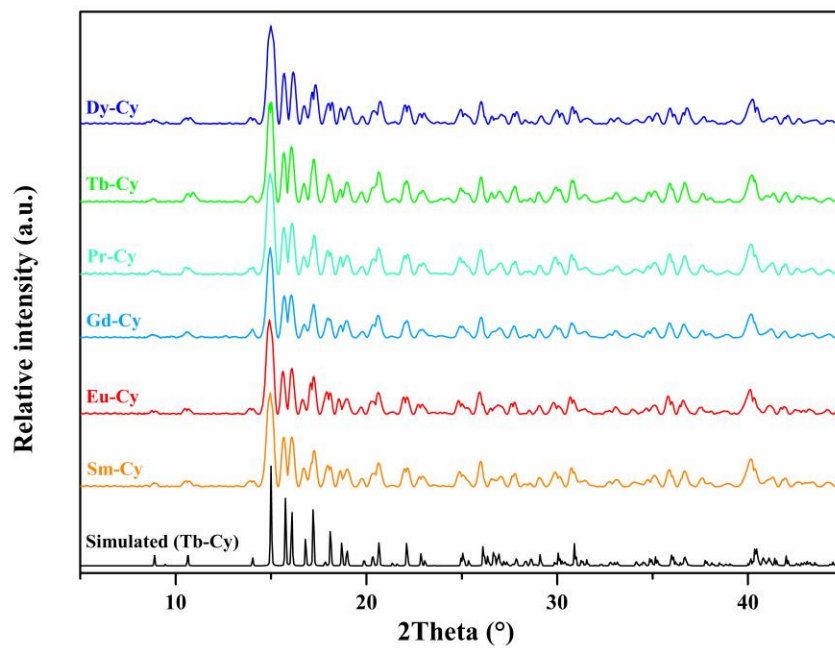

**Figure S16.** Experimental and simulated PXRD patterns for Ln-Cy series 1.

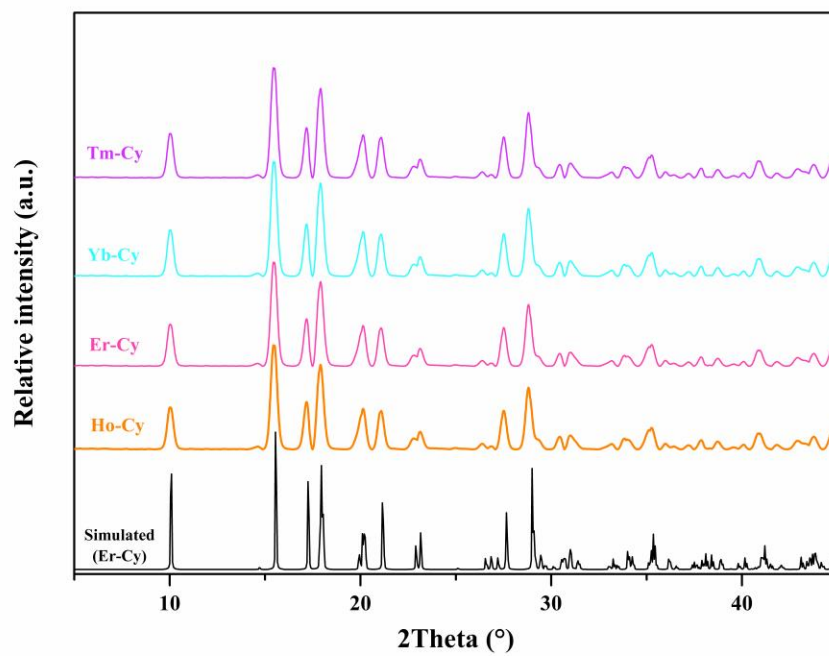

**Figure S17.** Experimental and simulated PXRD patterns for Ln-Cy series 2.

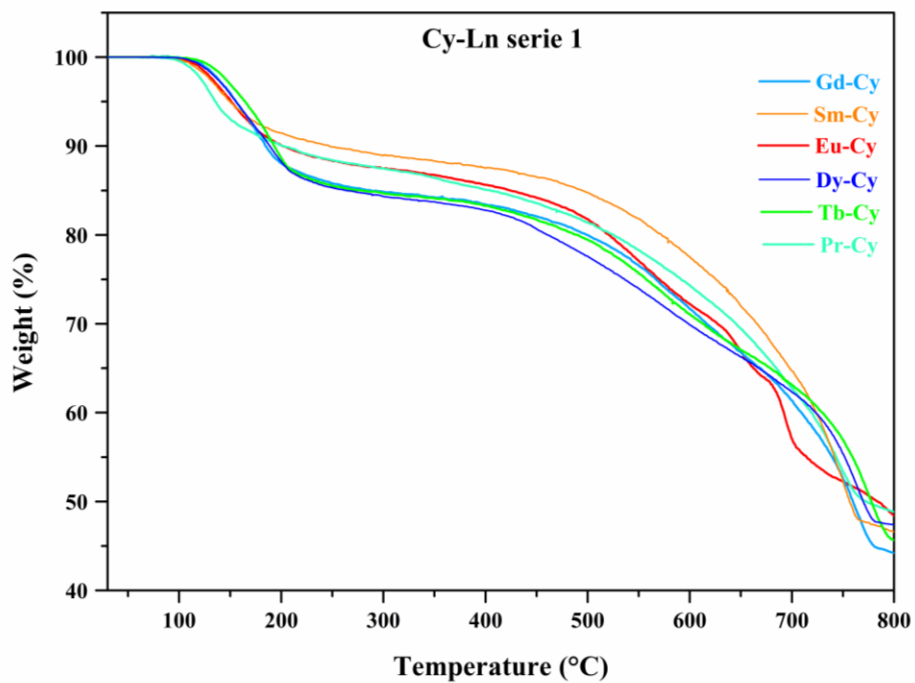

**Figure S18.** Thermogravimetric analysis curves for Ln-Cy series 1.

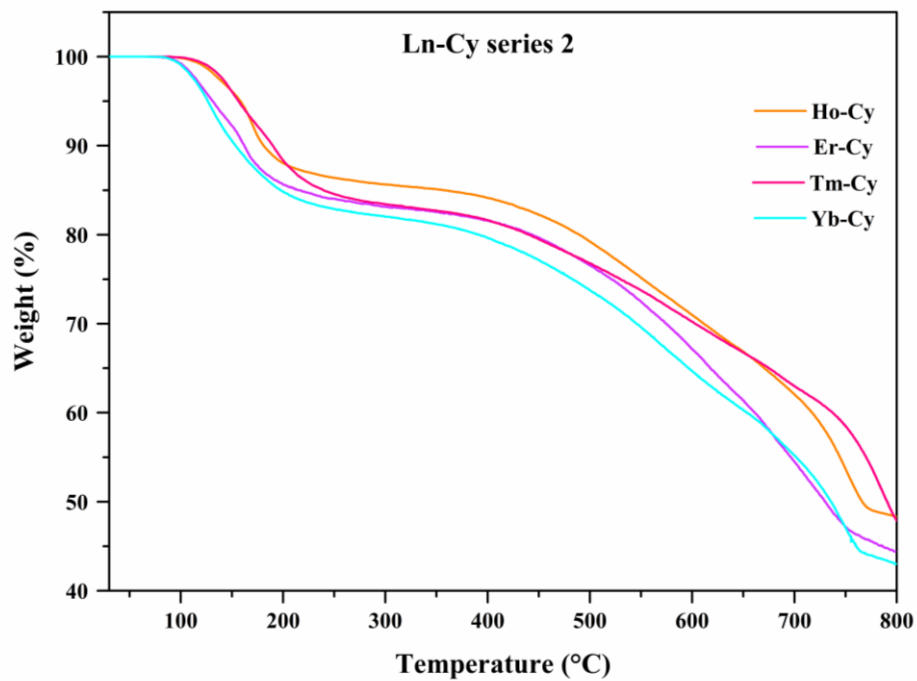

**Figure S19.** Thermogravimetric analysis curves for Ln-Cy series 2.

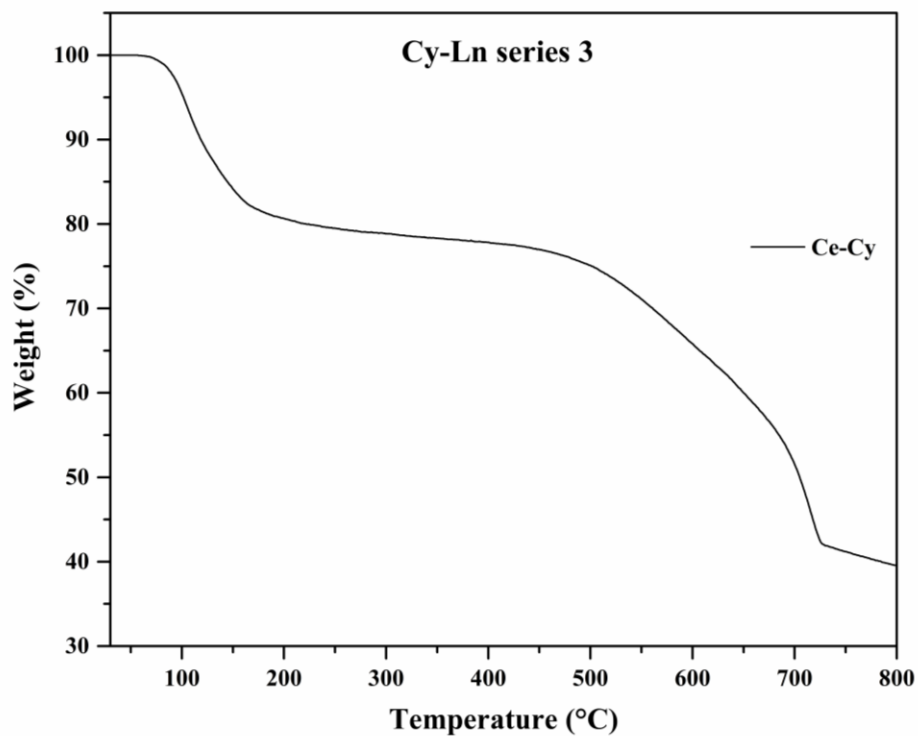

**Figure S20.** Thermogravimetric analysis curve for Ln-Cy series 3.

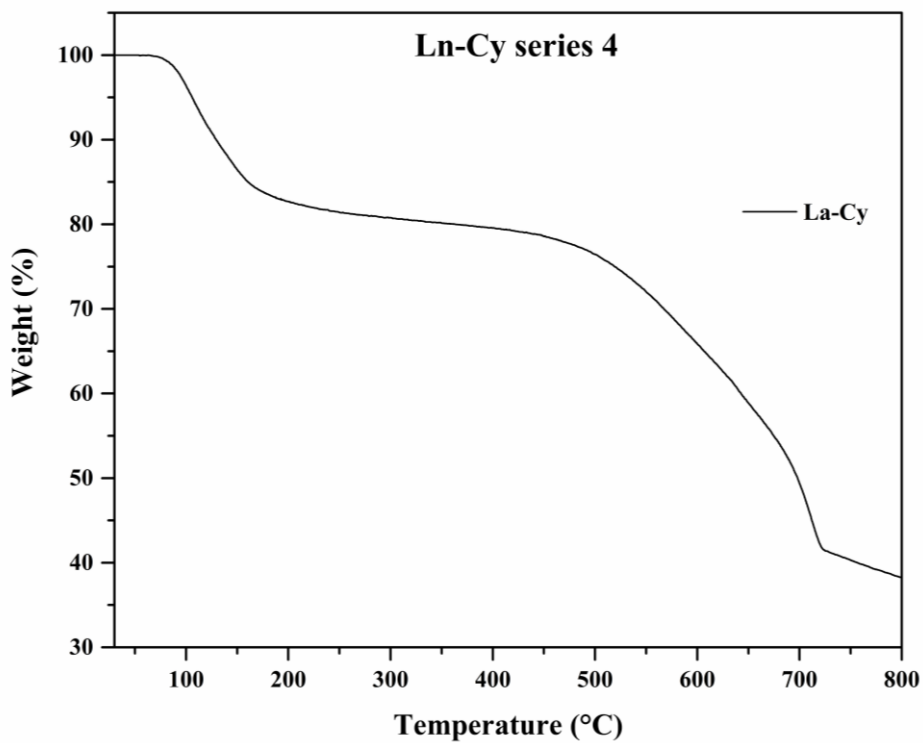

**Figure S21.** Thermogravimetric analysis curve for Ln-Cy series 4.

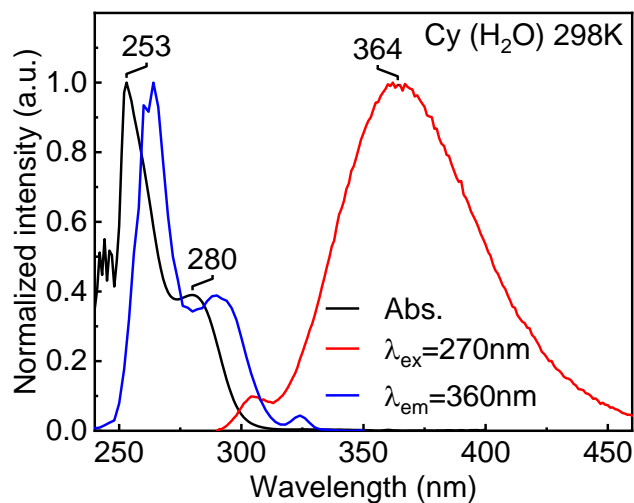

**Figure S22.** Absorption (black), emission (red) and excitation (blue) spectra for  $\text{K}_3\text{Cy}$  in solution in water at 298 K ( $\lambda_{\text{ex}} = 270 \text{ nm}$ ,  $\lambda_{\text{em}} = 364 \text{ nm}$ ). The weak signal at  $\sim 305 \text{ nm}$  is suspected to be fluorescence, and the large and intense one centered at 364 nm is assigned to a triplet emission. Unfortunately, the ligand decomposes upon laser exposure at 266 nm, so the fluorescence lifetime is not accessible.

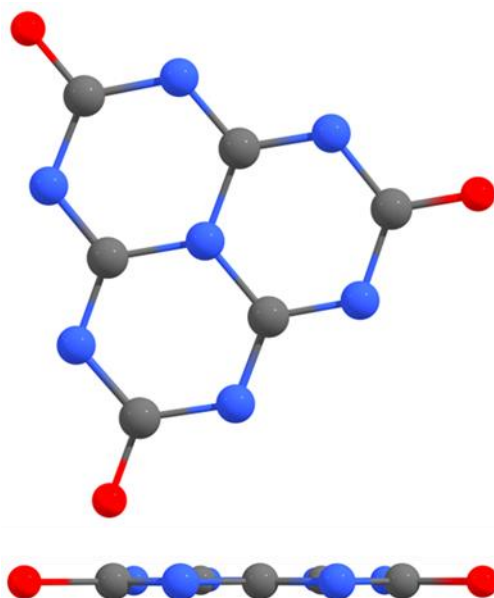

**Figure S23.** Side and front view of geometry optimization for  $\text{Cy}^{3-}$  anion in the gas phase.

**Table S6.** Cartesian coordinates (Å) of the geometry optimized  $\text{Cy}^{3-}$  in the gas phase.

| Atoms | X               | Y              | Z               |
|-------|-----------------|----------------|-----------------|
| N     | -0.616832047104 | 4.593426455720 | 10.643241677131 |
| N     | -2.392938011823 | 4.179950631859 | 12.175222354486 |
| N     | -2.601393328827 | 5.897099191815 | 10.457273921951 |
| N     | -0.850536754913 | 6.277494976359 | 8.975304675126  |
| N     | 1.194261540371  | 4.960235032302 | 9.140301135928  |
| N     | 1.392707332124  | 3.321883430688 | 10.778282948480 |
| N     | -0.443605631222 | 2.922080382750 | 12.331305935801 |
| O     | 1.503605907509  | 1.736624383553 | 12.415036752309 |
| O     | -4.268256069265 | 5.459625132085 | 11.951980835584 |
| O     | 0.914746741299  | 6.585211070393 | 7.563679330435  |
| C     | -1.164439084449 | 3.881151730106 | 11.743329421367 |
| C     | -3.110839886592 | 5.184571683521 | 11.536714492874 |
| C     | -1.374686841214 | 5.614201193252 | 10.009908851508 |
| C     | 0.429182880429  | 5.953775768550 | 8.540049561437  |
| C     | 0.688544242850  | 4.284265570210 | 10.175829308703 |
| C     | 0.831078298913  | 2.641808627374 | 11.852851066965 |

**Table S7.** Calculated position, oscillator strength (f) and major contributions (%) of the first 100 singlet-singlet electronic transitions for  $\text{Cy}^{3-}$  in the gas phase.

| N°. | $\lambda$ (nm) | f      | Major contributions (%)                                     |
|-----|----------------|--------|-------------------------------------------------------------|
| 1   | 289            | 0      | HOMO→LUMO (97%)                                             |
| 2   | 257            | 0      | H-3→LUMO (90%)                                              |
| 3   | 248            | 0      | H-5→LUMO (11%), H-4→LUMO (19%), H-3→L+1 (57%)               |
| 4   | 248            | 0      | H-5→LUMO (20%), H-4→LUMO (11%), H-3→L+2 (56%)               |
| 5   | 246            | 0.0464 | HOMO→L+1 (87%)                                              |
| 6   | 246            | 0.0463 | HOMO→L+2 (87%)                                              |
| 7   | 244            | 0      | H-4→LUMO (42%), H-3→L+1 (16%)                               |
| 8   | 244            | 0      | H-5→LUMO (42%), H-3→L+2 (16%)                               |
| 9   | 241            | 0      | H-6→LUMO (70%)                                              |
| 10  | 235            | 0.0092 | H-5→L+1 (32%), H-5→L+2 (14%), H-4→L+1 (14%), H-4→L+2 (32%)  |
| 11  | 234            | 0      | H-8→LUMO (38%), H-6→L+1 (16%)                               |
| 12  | 234            | 0      | H-9→LUMO (38%), H-6→L+2 (15%)                               |
| 13  | 231            | 0.05   | H-2→L+1 (10%), H-1→LUMO (74%), H-1→L+2 (10%)                |
| 14  | 231            | 0.05   | H-2→LUMO (74%), H-2→L+2 (10%), H-1→L+1 (10%)                |
| 15  | 229            | 0      | H-2→L+1 (47%), H-1→L+2 (47%)                                |
| 16  | 224            | 0      | H-5→L+1 (24%), H-4→LUMO (14%), H-4→L+2 (24%), H-3→L+1 (10%) |
| 17  | 224            | 0      | H-5→LUMO (14%), H-5→L+2 (24%), H-4→L+1 (24%),               |

|    |     |                  |                                                                               |
|----|-----|------------------|-------------------------------------------------------------------------------|
|    |     |                  | H-3→L+2 (10%)                                                                 |
| 18 | 221 | 0                | H-2→L+2 (45%), H-1→L+1 (44%)                                                  |
| 19 | 221 | 0                | H-6→LUMO (12%), H-5→L+1 (11%), H-5→L+2 (26%),<br>H-4→L+1 (26%), H-4→L+2 (12%) |
| 20 | 216 | 0.0348           | H-7→L+1 (46%), H-2→L+1 (19%), H-1→L+2 (20%)                                   |
| 21 | 216 | 0.0351           | H-7→L+2 (46%), H-2→L+2 (20%), H-1→L+1 (19%)                                   |
| 22 | 215 | 0                | H-9→L+1 (11%), H-8→L+2 (11%), H-6→L+1 (63%)                                   |
| 23 | 215 | 0                | H-9→L+2 (11%), H-8→L+1 (11%), H-6→L+2 (63%)                                   |
| 24 | 211 | 3E <sup>-4</sup> | H-9→L+1 (34%), H-9→L+2 (13%), H-8→L+1 (13%),<br>H-8→L+2 (34%)                 |
| 25 | 205 | 0                | H-9→L+1 (11%), H-9→L+2 (26%), H-8→L+1 (29%),<br>H-8→L+2 (10%), H-6→LUMO (16%) |
| 26 | 205 | 0                | H-9→L+1 (20%), H-9→L+2 (10%), H-8→LUMO (26%),<br>H-8→L+1 (10%), H-8→L+2 (19%) |
| 27 | 205 | 0                | H-9→LUMO (25%), H-9→L+2 (21%), H-8→L+1 (18%),<br>H-8→L+2 (10%)                |
| 28 | 201 | 0                | H-7→LUMO (88%)                                                                |
| 29 | 197 | 0.9068           | H-7→L+1 (43%), H-2→L+1 (13%), H-1→LUMO (20%),<br>H-1→L+2 (13%)                |
| 30 | 197 | 0.9064           | H-7→L+2 (43%), H-2→LUMO (20%), H-2→L+2 (13%),<br>H-1→L+1 (13%)                |
| 31 | 180 | 0                | H-10→LUMO (78%)                                                               |
| 32 | 180 | 0                | H-11→LUMO (78%)                                                               |
| 33 | 174 | 0.0033           | H-12→LUMO (41%), H-11→L+1 (29%), H-10→L+2<br>(29%)                            |
| 34 | 174 | 0                | H-11→L+2 (49%), H-10→L+1 (49%)                                                |
| 35 | 170 | 0                | H-11→LUMO (13%), H-11→L+2 (36%), H-10→L+1<br>(36%)                            |
| 36 | 170 | 0                | H-11→L+1 (36%), H-10→LUMO (13%), H-10→L+2<br>(36%)                            |
| 37 | 164 | 3E <sup>-4</sup> | H-12→LUMO (57%), H-11→L+1 (21%), H-10→L+2<br>(21%)                            |
| 38 | 163 | 0                | H-12→L+1 (87%)                                                                |
| 39 | 163 | 0                | H-12→L+2 (87%)                                                                |
| 40 | 153 | 8E <sup>-4</sup> | HOMO→L+3 (90%)                                                                |
| 41 | 153 | 8E <sup>-4</sup> | HOMO→L+4 (90%)                                                                |
| 42 | 152 | 0                | H-3→L+3 (59%), H-3→L+4 (22%)                                                  |
| 43 | 152 | 0                | H-3→L+3 (22%), H-3→L+4 (59%)                                                  |
| 44 | 150 | 0                | H-14→L+1 (47%), H-13→L+2 (47%)                                                |
| 45 | 150 | 0.0045           | H-13→LUMO (80%)                                                               |
| 46 | 150 | 0.0045           | H-14→LUMO (80%)                                                               |
| 47 | 148 | 0                | H-5→L+3 (46%), H-4→L+4 (46%)                                                  |
| 48 | 146 | 0                | H-6→L+4 (33%), H-5→L+3 (24%), H-4→L+4 (24%)                                   |
| 49 | 146 | 0                | H-6→L+3 (33%), H-5→L+4 (24%), H-4→L+3 (24%)                                   |



|    |     |                  |                                                                |
|----|-----|------------------|----------------------------------------------------------------|
| 50 | 145 | 0.0163           | H-14→L+1 (21%), H-13→L+2 (21%), H-2→L+4 (11%), H-1→L+3 (11%)   |
| 51 | 145 | 0.0163           | H-14→L+2 (20%), H-13→L+1 (21%), H-2→L+3 (11%), H-1→L+4 (11%)   |
| 52 | 145 | 0                | H-9→L+3 (44%), H-8→L+4 (44%)                                   |
| 53 | 144 | 0                | H-14→L+2 (14%), H-13→L+1 (14%), H-2→L+3 (29%), H-1→L+4 (29%)   |
| 54 | 143 | 0                | H-2→L+4 (42%), H-1→L+3 (44%)                                   |
| 55 | 143 | 0.0061           | H-5→L+4 (46%), H-4→L+3 (47%)                                   |
| 56 | 143 | 2E <sup>-4</sup> | H-14→L+1 (14%), H-13→L+2 (14%), H-2→L+4 (22%), H-1→L+3 (20%)   |
| 57 | 143 | 2E <sup>-4</sup> | H-14→L+2 (14%), H-13→L+1 (14%), H-2→L+3 (21%), H-1→L+4 (21%)   |
| 58 | 142 | 0                | H-6→L+3 (27%), H-5→L+4 (11%), H-4→L+3 (11%)                    |
| 59 | 142 | 0                | H-6→L+4 (27%), H-5→L+3 (11%), H-4→L+4 (11%)                    |
| 60 | 140 | 0                | H-14→L+2 (31%), H-13→L+1 (31%), H-2→L+3 (11%), H-1→L+4 (11%)   |
| 61 | 137 | 0.008            | H-15→L+1 (20%), H-7→L+3 (31%), H-7→L+4 (43%)                   |
| 62 | 137 | 0.008            | H-15→L+2 (20%), H-7→L+3 (43%), H-7→L+4 (31%)                   |
| 63 | 136 | 0                | H-9→L+4 (29%), H-8→L+3 (30%), H-6→L+3 (29%)                    |
| 64 | 136 | 0                | H-9→L+3 (30%), H-8→L+4 (30%), H-6→L+4 (29%)                    |
| 65 | 134 | 1E <sup>-4</sup> | H-9→L+4 (48%), H-8→L+3 (47%)                                   |
| 66 | 134 | 0                | H-15→LUMO (90%)                                                |
| 67 | 133 | 0                | HOMO→L+5 (99%)                                                 |
| 68 | 132 | 0.0087           | H-15→L+1 (65%), H-7→L+4 (12%)                                  |
| 69 | 132 | 0.0088           | H-15→L+2 (65%), H-7→L+3 (12%)                                  |
| 70 | 131 | 0                | H-17→LUMO (10%), H-16→LUMO (65%)                               |
| 71 | 131 | 0                | H-17→LUMO (65%), H-16→LUMO (10%)                               |
| 72 | 127 | 0.0083           | H-20→LUMO (32%), H-17→L+2 (25%), H-16→L+1 (25%)                |
| 73 | 126 | 0                | H-17→L+1 (38%), H-17→L+2 (11%), H-16→L+1 (11%), H-16→L+2 (37%) |
| 74 | 126 | 0                | HOMO→L+6 (84%)                                                 |
| 75 | 124 | 0                | H-17→L+1 (33%), H-16→L+2 (34%)                                 |
| 76 | 124 | 0                | H-17→L+2 (34%), H-16→L+1 (34%)                                 |
| 77 | 124 | 0                | H-1→L+5 (83%)                                                  |
| 78 | 124 | 0                | H-2→L+5 (84%)                                                  |
| 79 | 124 | 0                | H-3→L+5 (89%)                                                  |
| 80 | 121 | 0.0127           | H-19→LUMO (13%), H-18→LUMO (28%), H-5→L+5 (20%), H-4→L+5 (30%) |
| 81 | 121 | 0.0126           | H-19→LUMO (28%), H-18→LUMO (14%), H-5→L+5 (30%), H-4→L+5 (20%) |
| 82 | 121 | 0                | H-3→L+6 (64%)                                                  |
| 83 | 121 | 0.0172           | H-11→L+3 (10%), H-11→L+4 (38%), H-10→L+3 (38%),                |

|     |     |        |                                                                                  |
|-----|-----|--------|----------------------------------------------------------------------------------|
|     |     |        | H-10→L+4 (10%)                                                                   |
| 84  | 121 | 0.0022 | H-18→LUMO (39%), H-5→L+5 (15%), H-4→L+5 (10%)                                    |
| 85  | 121 | 0.0023 | H-19→LUMO (39%), H-5→L+5 (10%), H-4→L+5 (15%)                                    |
| 86  | 121 | 0      | H-12→L+4 (13%), H-11→L+3 (28%), H-10→L+4 (28%)                                   |
| 87  | 121 | 0      | H-12→L+3 (13%), H-11→L+4 (28%), H-10→L+3 (28%)                                   |
| 88  | 119 | 0.0089 | H-19→L+1 (16%), H-19→L+2 (19%), H-18→L+1 (21%),<br>H-18→L+2 (14%), H-5→L+5 (15%) |
| 89  | 119 | 0.0089 | H-19→L+1 (20%), H-19→L+2 (15%), H-18→L+1 (15%),<br>H-18→L+2 (20%), H-4→L+5 (15%) |
| 90  | 119 | 0      | H-19→L+1 (15%), H-19→L+2 (22%), H-18→L+1 (20%),<br>H-18→L+2 (16%), H-6→L+5 (12%) |
| 91  | 119 | 0.0019 | H-20→LUMO (64%), H-17→L+2 (13%), H-16→L+1<br>(13%)                               |
| 92  | 118 | 0      | H-20→L+1 (33%), H-5→L+6 (29%), H-4→L+6 (10%)                                     |
| 93  | 118 | 0      | H-20→L+2 (32%), H-5→L+6 (10%), H-4→L+6 (29%)                                     |
| 94  | 118 | 0      | H-19→L+1 (27%), H-19→L+2 (20%), H-18→L+1 (20%),<br>H-18→L+2 (27%)                |
| 95  | 118 | 0      | H-3→L+6 (18%), HOMO→L+7 (60%)                                                    |
| 96  | 118 | 0.0088 | H-1→L+6 (88%)                                                                    |
| 97  | 118 | 0.0088 | H-2→L+6 (88%)                                                                    |
| 98  | 118 | 0      | H-20→L+1 (56%), H-5→L+6 (20%)                                                    |
| 99  | 118 | 0      | H-20→L+2 (57%), H-4→L+6 (20%)                                                    |
| 100 | 117 | 0.0039 | H-7→L+5 (97%)                                                                    |

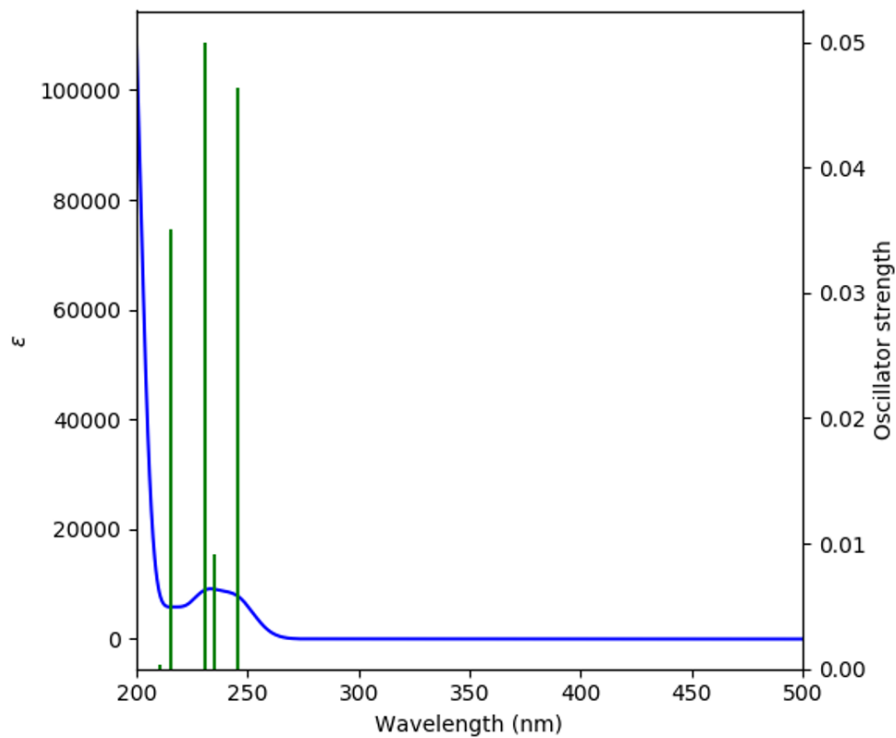

**Figure S24.** Simulated absorption spectrum for  $\text{Cy}^{3-}$  in the gas phase by TDDFT computations. Bar graph reporting the calculated oscillator strength and the calculated position of the 100th electronic transitions calculated by TDDFT for  $\text{Cy}^{3-}$  in the gas phase (bar graph;  $f$  = computed oscillator strength).

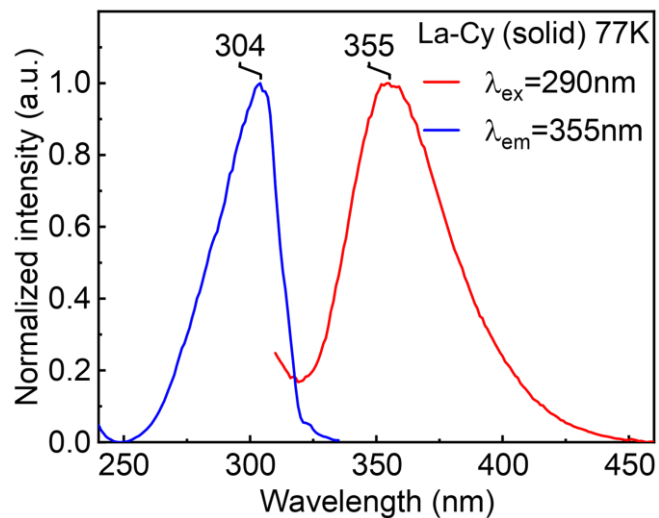

**Figure S25.** Solid-state absorption (black), emission (red) and excitation (blue) spectra for La-Cy at 298 K ( $\lambda_{\text{ex}} = 270$  nm,  $\lambda_{\text{em}} = 335$  nm) and 77K ( $\lambda_{\text{ex}} = 270$  nm,  $\lambda_{\text{em}} = 355$  nm).

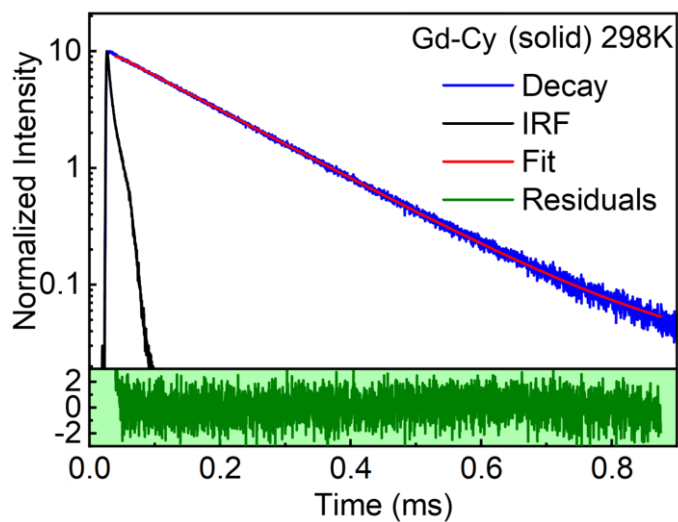

**Figure S26.** Decay of emission intensity, fit, IRF and residual of Gd-Cy at 298 K.  $\lambda = 339$  nm ( $\lambda_{\text{ex}} = 277$  nm),  $\tau_e \{f\% \} = 15 \mu\text{s} \{100\}$ ,  $\chi^2 = 1.070$ .

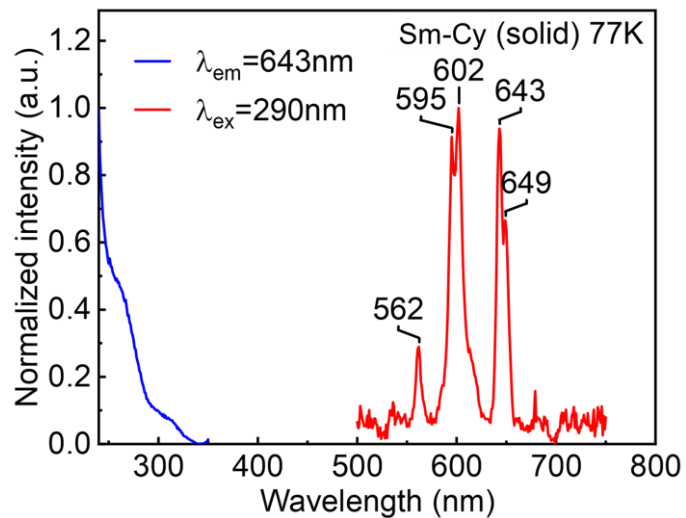

**Figure S27.** Solid-state absorption (black), emission (red) and excitation (blue) spectra for Sm-Cy at 77K ( $\lambda_{ex} = 290$  nm,  $\lambda_{em} = 643$  nm).

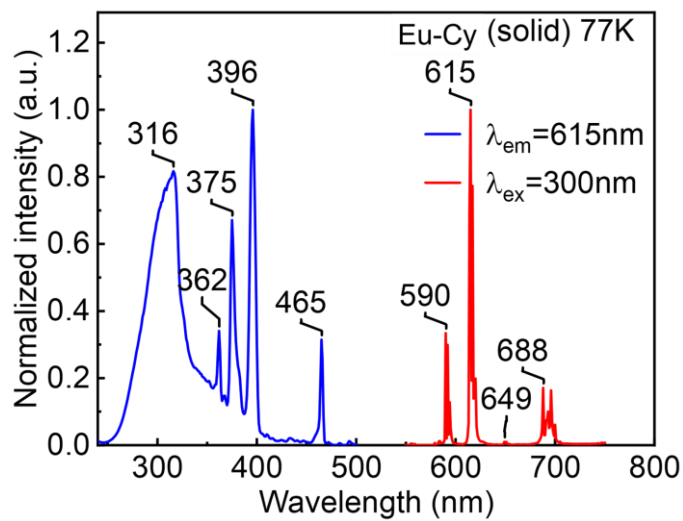

**Figure S28.** Solid-state absorption (black), emission (red) and excitation (blue) spectra for Eu-Cy at 77K ( $\lambda_{ex} = 300$  nm,  $\lambda_{em} = 615$  nm).

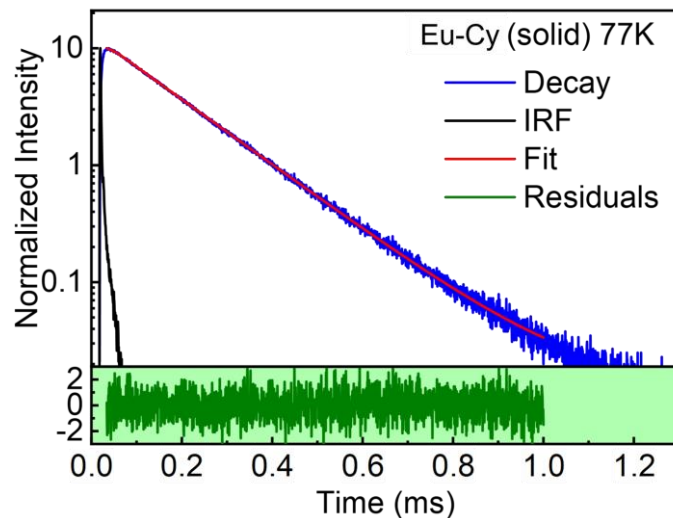

**Figure S29.** Decay of emission intensity, fit, IRF and residual of Eu-Cy. Left at 77 K  $\lambda = 615$  nm ( $\lambda_{\text{ex}} = 300$  nm),  $\tau_e$  {f%} = 16  $\mu\text{s}$  {100},  $\chi^2 = 1.001$ .

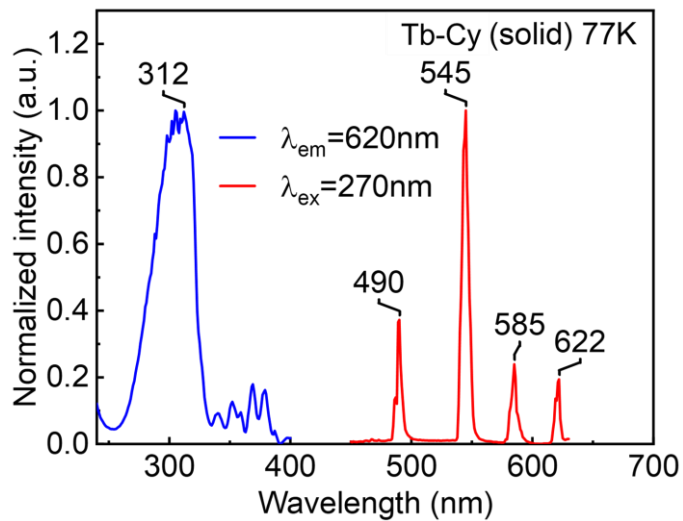

**Figure S30.** Solid-state absorption (black), emission (red) and excitation (blue) spectra for Tb-Cy at 77K ( $\lambda_{\text{ex}} = 270$  nm,  $\lambda_{\text{em}} = 620$  nm).

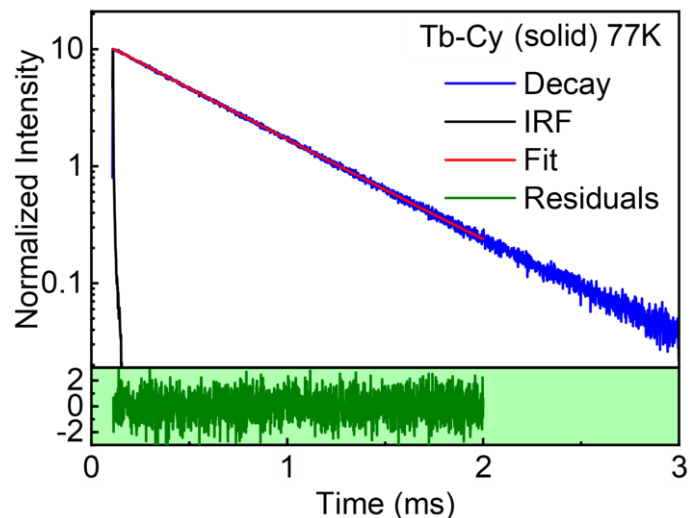

**Figure S31.** Decay of emission intensity, fit, IRF and residual of Tb-Cy. Left, at 77 K  $\lambda = 620$  nm ( $\lambda_{\text{ex}} = 270$  nm),  $\tau_e$  {f%} = 50  $\mu\text{s}$  {100},  $\chi^2 = 1.031$ .

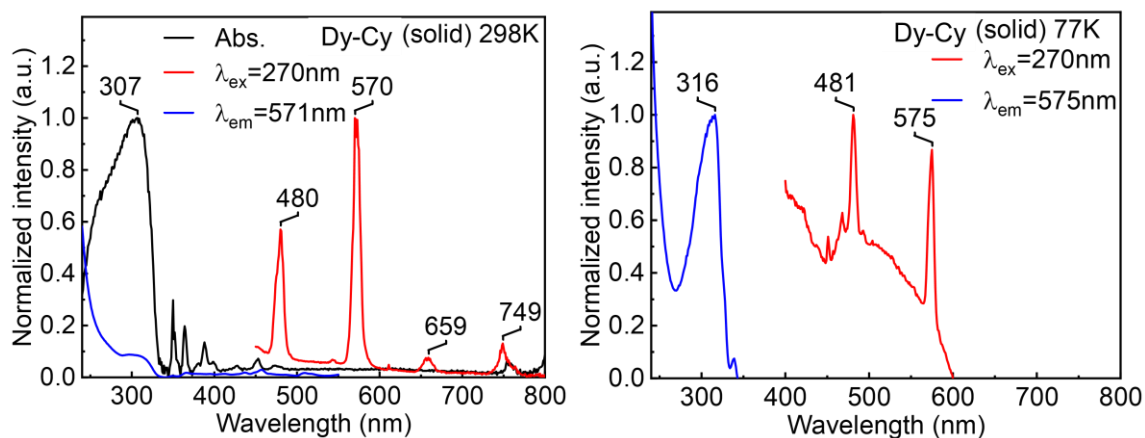

**Figure S32.** Solid-state absorption (black), emission (red) and excitation (blue) spectra for Dy-Cy at 298 K ( $\lambda_{\text{ex}} = 270$  nm,  $\lambda_{\text{em}} = 571$  nm) and 77K ( $\lambda_{\text{ex}} = 270$  nm,  $\lambda_{\text{em}} = 575$  nm).

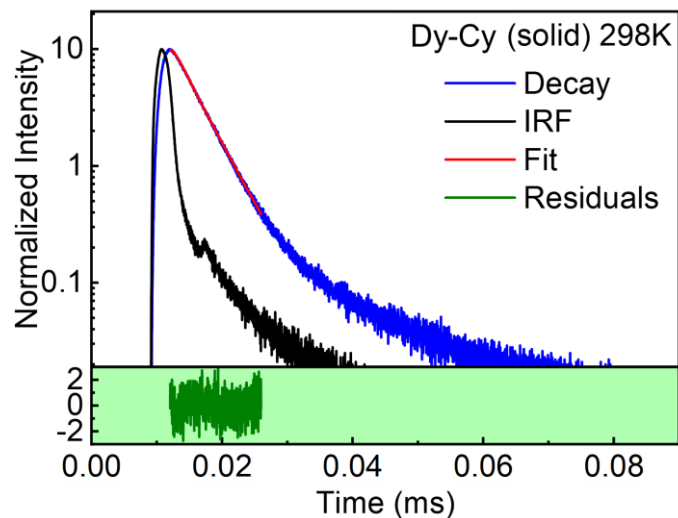

**Figure S33.** Decay of emission intensity, fit, IRF and residual of Dy-Cy at 298 K.  $\lambda = 570$  nm ( $\lambda_{\text{ex}} = 270$  nm),  $\tau_e$  {f%} = 3.48  $\mu\text{s}$  {100},  $\chi^2 = 1.034$ .

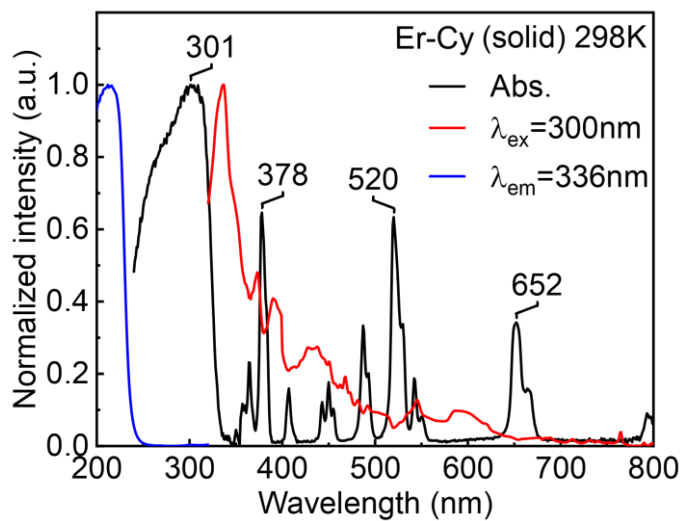

**Figure S34.** Solid-state absorption (black), emission (red) and excitation (blue) spectra for Er-Cy at 298 K ( $\lambda_{\text{ex}} = 300$  nm,  $\lambda_{\text{em}} = 336$  nm).



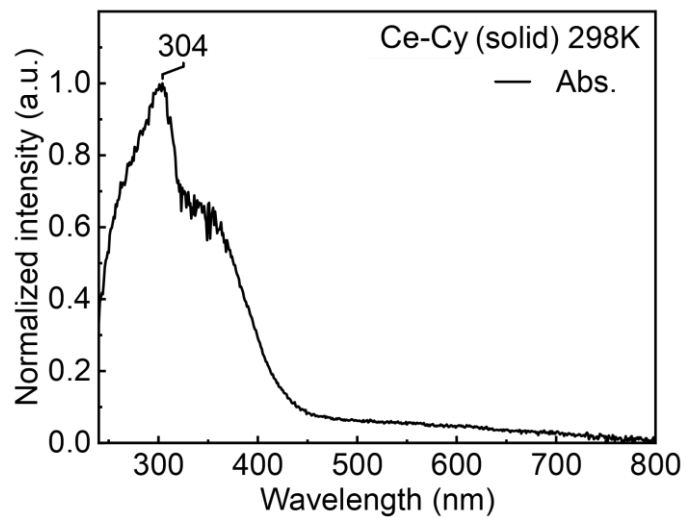

**Figure S35.** Solid-state absorption (black) spectra for Ce-Cy at 298 K.

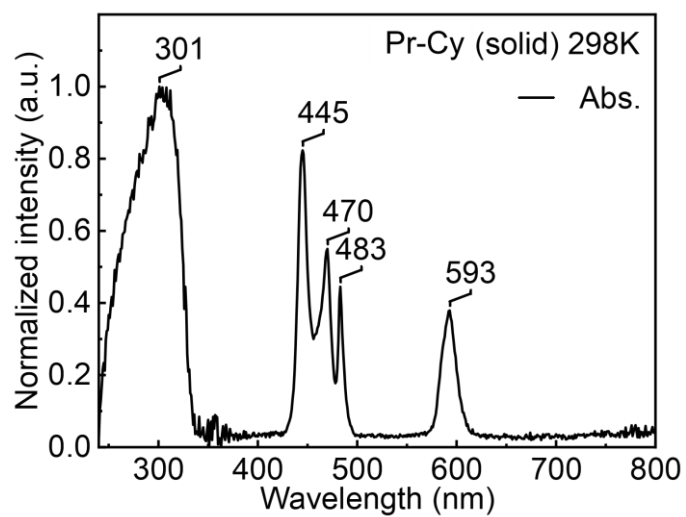

**Figure S36.** Solid-state absorption (black) spectra for Pr-Cy- at 298 K.

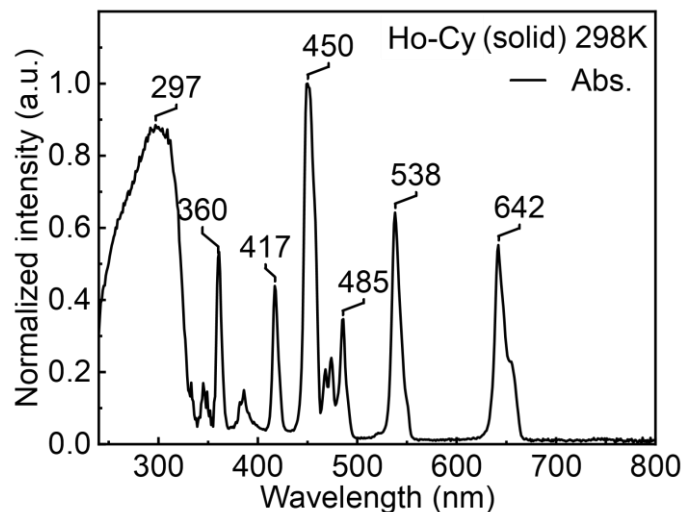

**Figure S37.** Solid-state absorption (black) for Ho-Cy at 298 K.

**Table S8.** Photophysical properties of all emissive Ln-Cy.

| Photophysical series                                                                |       | T(K) | $\lambda_{ex}$<br>(nm) | $\lambda_{em}$<br>(nm) | Corresponding<br>transitions                                     | $\tau_e$ {f%}                                                                   | $\chi^2$ |
|-------------------------------------------------------------------------------------|-------|------|------------------------|------------------------|------------------------------------------------------------------|---------------------------------------------------------------------------------|----------|
| (A)<br>only the ligand is<br>emissive in the<br>visible region                      | La-Cy | 298  | 270                    | 360                    | $\pi \rightarrow \pi^*$                                          | 3.3 $\mu$ s<br>{67.80}, 76.2<br>$\mu$ s {32.20}                                 | 1.044    |
|                                                                                     | Gd-Cy | 298  | 277                    | 339                    |                                                                  | 15 $\mu$ s {100}                                                                | 1.070    |
|                                                                                     | Tm-Cy | 298  | 270                    | 620                    |                                                                  | ----                                                                            | ----     |
| (B)<br>both ligand and<br>lanthanide metal<br>are emissive in<br>the visible region | Yb-Cy | 298  | 270                    | 328                    | $\pi \rightarrow \pi^*$<br>${}^2F_{5/2} \rightarrow {}^2F_{7/2}$ | ----                                                                            | ----     |
| (C)<br>only the<br>lanthanide metal<br>is emissive in the<br>visible region         | Sm-Cy | 298  | 310                    | 641                    | ${}^4G_{5/2} \rightarrow {}^6H_{9/2}$                            | 44.9 $\mu$ s<br>{6.4}, 270 $\mu$ s<br>{8.5}, 1.1 ms<br>{16.3}, 4.0<br>ms {68.9} | 1.072    |
|                                                                                     | Eu-Cy | 298  | 300                    | 615                    | ${}^5D_0 \rightarrow {}^4F_2$                                    | 6.7 $\mu$ s<br>{2.37}, 150<br>$\mu$ s {89.5}, 53<br>$\mu$ s {8.1}               | 1.004    |
|                                                                                     | Tb-Cy | 298  | 270                    | 545                    | ${}^5D_4 \rightarrow {}^4F_5$                                    | 49 $\mu$ s {100}                                                                | 1.021    |
|                                                                                     | Dy-Cy | 298  | 270                    | 570                    | ${}^4F_{9/2} \rightarrow {}^6H_{13/2}$                           | 3.48 $\mu$ s<br>{100}                                                           | 1.034    |
|                                                                                     | Er-Cy | 298  | 300                    | 336                    | ${}^4S_{3/2} \rightarrow {}^4I_{15/2}$                           | ----                                                                            | ----     |
